# Supplementary material
Source: HighWire-hosted journal article supplement (http://d2538ggaoe6cji.cloudfront.net/highwire/filestream/42657/field_highwire_adjunct_files/0/144204-1.pdf)
Supplement: 144204-1.pdf [file 144204-1.pdf]

## Supplementary Information

### On the use of the experimentally determined enzyme inhibition constant as a measure of absolute binding affinity

Fouad H. Darras and Yuan-Ping Pang

Computer-Aided Molecular Design Laboratory, Mayo Clinic, Rochester, MN 55905, USA

Correspondence should be addressed to pang@mayo.edu

#### Table of Contents

|                                                                                           |    |
|-------------------------------------------------------------------------------------------|----|
| Chemicals                                                                                 | 2  |
| Inhibitor purity                                                                          | 2  |
| General lab supplies                                                                      | 2  |
| General lab tools and equipments for enzyme inhibition assay                              | 3  |
| Inhibitor solutions                                                                       | 4  |
| The phosphate buffer for preparing Ellman assay reagents                                  | 4  |
| DTNB solution                                                                             | 5  |
| ATCh solutions                                                                            | 5  |
| The phosphate buffer for preparing enzyme stock solution                                  | 5  |
| Enzyme stock solution                                                                     | 6  |
| The phosphate buffer for preparing enzyme solutions                                       | 6  |
| Enzyme solutions                                                                          | 7  |
| Specific enzyme activity and $K_i$ determination                                          | 7  |
| UV absorptions of inhibitor solutions that were prepared using glass or plastic vials     | 10 |
| Table S1. ATCh hydrolysis rate, $K_i$ , and specific enzyme activity                      | 11 |
| Table S2. UV Absorbance data of inhibitor solutions prepared using glass or plastic vials | 18 |
| Figure S1. Plots for $K_i$ determination under different assay conditions                 | 19 |
| References                                                                                | 31 |

**Chemicals.**  $\text{NaH}_2\text{PO}_4$ ,  $\text{Na}_2\text{HPO}_4$ , acetylthiocholine chloride (ATCh), and Triton X-100 were purchased from ACROS (Morris Plains, NJ). 5,5'-Dithiobis(2-nitrobenzoic acid) (DTNB) and 9-amino-1,2,3,4-tetrahydroacridinium monohydrochloride (tacrine) were ordered from Sigma-Aldrich (St. Louis, MO). 1,7-N-heptylene-bis-9,9'-amino-1,2,3,4-tetrahydro-acridinium dihydrochloride [Bis(7)-tacrine] was synthesized according to a published scheme<sup>1</sup>.

**Inhibitor Purity.** Tacrine: Anal. Calcd. for  $\text{C}_{13}\text{H}_{17}\text{ClN}_2\text{O}$ : C, 61.78; H, 6.78; N, 11.08. Found: C, 61.57; H, 7.20; N, 11.17. Bis(7)-tacrine: Anal. Calcd. for  $\text{C}_{32}\text{H}_{44}\text{Cl}_2\text{N}_4\text{O}_2$ : C, 65.41; H, 7.55; N, 9.53. Found: C, 65.81; H, 7.63; N, 9.34. Both elemental Analyses were performed at NuMega (San Diego, CA).

**Enzymes.** *Electrophorus electricus* acetylcholinesterase (*eeAChE*) was purchased from Sigma-Aldrich (St. Louis, MO; catalog # of C2888 with log #s of SLBN0954V and SLBS4398 and specific enzyme activity of  $\geq 1000$  U/mg; catalog # of 3389 with log # of SLBL3186V and specific enzyme activity of 200–1000 U/mg).

**General lab supplies.** The 1.5-mL or 2.0-mL microcentrifuge tubes were purchased from Fisher Scientific (Asheville, NC; catalog #s of 02-682-550 for 1.5-mL and 02-681-258 for 2.0-mL). The 7.4-mL general-purpose borosilicate glass vials were purchased from Fisher Scientific (Asheville, NC; catalog # of 03-339-22D). The 15-mL conical centrifuge tubes were purchased from Fisher Scientific (Asheville, NC; catalog # of 352095). The 0.2-mL MicroAmp<sup>®</sup> 8-tube strips were purchased from Applied Biosystems (Foster City, CA; catalog # of N8010580). The 100-mL and 250-mL reagent bottles were purchased from Fisher Scientific (Asheville, NC; product #s of S02286 for 100-mL and S02286A for 250-mL). The 16-mL dark-glass reagent bottles were purchased from Fisher Scientific (Asheville, NC; catalog # of 03-339-23D). Natural, non-sterile, low-retention, 0.1–10- $\mu\text{L}$  pipet tips were

purchased from Fisher Scientific (Asheville, NC; catalog # of 02717-134). Natural, non-sterile 100–300- $\mu$ L and 100–1000- $\mu$ L pipet tips were purchased from Molecular BioProducts (San Diego, CA; catalog # of 3580 and 3771, respectively). The non-sterile, flat bottom, clear, 96-well plates were purchased from Fisher Scientific (Asheville, NC; catalog # of 12565501). The 25-mL disposable Matrix™ Reagent Reservoirs were purchased from Fisher Scientific (Asheville, NC; catalog # of 14-387-071).

**General lab tools and equipment for enzyme inhibition assay.** Sodium phosphates, Ellman assay reagents, and inhibitors were weighed using either a three-digit analytical balance from Denver (Bohemia, NY; Model: RS232) or an analytic plus electronic balance from Ohaus (Florham Park, NJ; Model: AP250D). The Ellman assay reagent and inhibitor solutions were prepared using a 40-mm octagonal magnetic stir bar with integral pivot ring from Fisher Scientific (Asheville, NC; catalog # of 14-513-56) and a stirrer from CORNING (Tewksbury, MA; Model: PC420) for stirring at a speed of 4–6 revolutions per minute at  $26 \pm 1$  °C and transferred using an Eppendorf Reference series adjustable-volume 0.5–10- $\mu$ L pipette from Eppendorf (Hauppauge, NY; catalog # of 022470051), a Finnpiquette F1 1–10- $\mu$ L 8-channel pipette from Fisher Scientific (Asheville, NC; catalog # of 03-339-22D), an Eppendorf Research 8-channel 30–300- $\mu$ L pipette from Eppendorf (Hauppauge, NY; catalog # of 022452100), a 1000- $\mu$ L Pipetman P1000 pipette from Gilson (Middleton, WI; catalog # of EF13988P), a 20–200- $\mu$ L Eppendorf Research pipette from Eppendorf (Hauppauge, NY; catalog # ES-200), or an Eppendorf easypet electronic pipette filler from Eppendorf (Hauppauge, NY; catalog # of 4421 000.013), or a disposable Falcon® 25-mL serological pipette from CORNING (Tewksbury, MA; catalog #357525). The pH values of all sodium phosphate buffer solutions were determined using a pH meter from Fisher Scientific (Asheville, NC; Model: AP63). *ee*AChE activity or ATCh hydrolysis rate was determined using a SpectraMax Plus 384 Absorbance Microplate Reader with SoftMax Pro 4.7.1 from Molecular Devices (Sunnyvale, CA).

**Inhibitor solutions.** The 2.4 mM tacrine stock solution was freshly prepared by adding an appropriate amount of distilled water using a 1000- $\mu$ L Pipetman P1000 pipette to a 2.0-mL microcentrifuge tube (or a 7.4-mL glass vial) with  $\sim$ 1.0 mg of tacrine. Subsequent two-fold and 10-fold serial dilutions of the stock using distilled water yielded (1) a tacrine solution (1.8 mL for each enzyme inhibition assay) of 6.00  $\mu$ M, 0.60  $\mu$ M, or 0.06  $\mu$ M in a 2.0-mL microcentrifuge tube or a 7.4-mL glass vial using a 20–200  $\mu$ L Eppendorf Research pipette and a 1000- $\mu$ L Pipetman P1000 pipette, and (2) a tacrine solution (3.6 mL for each adsorption study) of 30.0  $\mu$ M, 20.0  $\mu$ M, 15.0  $\mu$ M, 10.0  $\mu$ M, 7.5  $\mu$ M, or 5.0  $\mu$ M in two 2.0-mL microcentrifuge tubes or a 7.4-mL glass threaded vial using a 20–200- $\mu$ L Eppendorf Research pipette and a 1000- $\mu$ L Pipetman P1000 pipette. The 1.2 mM bis(7)-tacrine stock solution was freshly prepared by adding an appropriate amount of distilled water using a 1000- $\mu$ L Pipetman P1000 pipette to a 2.0-mL microcentrifuge tube (or a 7.4-mL glass vial) with  $\sim$ 1.0 mg of bis(7)-tacrine. Subsequent two-fold and 10-fold serial dilutions of the stock using distilled water yielded (1) a bis(7)-tacrine solution (1.8 mL for each enzyme inhibition assay) of 600 nM, 60 nM, 6 nM, 600 pM, or 60 pM in a 2.0-mL microcentrifuge tube or a 7.4-mL glass vial using a 20–200  $\mu$ L Eppendorf Research pipette and a 1000- $\mu$ L Pipetman P1000 pipette, and (2) a bis(7)-tacrine solution (3.6 mL for each adsorption study) of 30.0  $\mu$ M, 20.0  $\mu$ M, 15.0  $\mu$ M, 10.0  $\mu$ M, 7.5  $\mu$ M, or 5.0  $\mu$ M in two 2.0-mL microcentrifuge tubes or a 7.4-mL general-purpose borosilicate glass threaded vial using a 20–200- $\mu$ L Eppendorf Research pipette and a 1000- $\mu$ L Pipetman P1000 pipette.

**The phosphate buffer for preparing Ellman assay reagents<sup>2</sup>.** To make 250 mL of 50 mM sodium phosphate buffer pH 8.0 at 26 °C, 1.5 g of  $\text{NaH}_2\text{PO}_4$  was added to  $\sim$ 230 mL distilled water in a 500-mL beaker. After stirring at 4–6 revolutions per minute for 10 minutes, the pH of the solution with a distilled-water-rinsed electrode immersed in the  $\text{NaH}_2\text{PO}_4$  solution under stirring was adjusted at 26 °C from initially 4.5 to 8.0 by adding drop-wise 1N NaOH. The volume of the solution was then

brought up to 250 mL with distilled water. Note: The buffer solution must be used within 12 hours and discard the remaining of the buffer solution after 12 hours.

**DTNB solution.** To prepare 2.5 mM DTNB solution, 9.9 mg of DTNB was dissolved in 10 mL of the freshly prepared 50 mM sodium phosphate buffer pH 8.0 that was stored in a 16-mL dark-glass reagent bottle. The resulting solution was stored in a refrigerator at 4 °C for 2–3 hours before transferring 2.0 mL of the DTNB solution to a 25-mL disposable Matrix™ Reagent Reservoir that was located in the vicinity of the Microplate Reader for measuring *ee*AChE activity. Note: Discard the remaining of the DTNB solution after each enzyme inhibition assay.

**ATCh solutions.** To prepare a stock solution of 30 mM ATCh, 86.8 mg ATCh was dissolved in 10 mL of the freshly prepared 50 mM sodium phosphate buffer pH 8.0 that was stored in a 15-mL conical centrifuge tube. Two-fold serial dilutions using 50 mM sodium phosphate buffer pH 8.0 in five 15-mL conical centrifuge tubes led to five working solutions of ATCh (5 mL) at concentrations of 15.000, 7.500, 3.750, 1.875, and 0.938 mM ATCh. All five ATCh working solutions were stored in a refrigerator at 4 °C for 2–3 hours before transferring 150 µL for each of these solutions to five tubes of a 0.2-mL MicroAmp® 8-tube strip that was located in the vicinity of the Microplate Reader for measuring *ee*AChE activity. Note: Discard the remaining of the ATCh solution after each enzyme inhibition assay.

**The phosphate buffer for preparing enzyme stock solution.** A stock of 500 mL of 20 mM NaH<sub>2</sub>PO<sub>4</sub> was prepared by dissolving 1.20 g of NaH<sub>2</sub>PO<sub>4</sub> in 500 mL distilled water in a 500-mL beaker and stirring at 4–6 revolutions per minute for 10 minutes. Another stock of 500 mL of 20 mM Na<sub>2</sub>HPO<sub>4</sub> was prepared by dissolving 1.42 g of Na<sub>2</sub>HPO<sub>4</sub> in 500 mL distilled water in a 500-mL beaker and stirring at 4–6 revolutions per minute for 10 minutes. After mixing the NaH<sub>2</sub>PO<sub>4</sub> stock with the Na<sub>2</sub>HPO<sub>4</sub> stock in 4:6 ratio and stirring at 4–6 revolutions per minute for 10 minutes, the pH of the

combined solution was adjusted at 26 °C, using a distilled-water-rinsed electrode immersed while the solution was kept stirring, to pH 7.0 by drop-wise addition of the  $\text{NaH}_2\text{PO}_4$  or  $\text{Na}_2\text{HPO}_4$  stock solution. The resulting solution was then stored in a refrigerator at 4 °C for three hours before the enzyme solution preparation. Note: The buffer solution must be used within 12 hours and discard the remaining of the buffer solution after 12 hours.

**Enzyme stock solution.** To the glass vial received from Sigma-Aldrich that contained 0.5 mg (or a fraction of 1.0 mg) of *eeAChE* as a lyophilized powder, 1.0 mL (or an appropriate amount) of a freshly prepared 20 mM sodium phosphate buffer solution pH 7.0 was added. The vial was then kept in a refrigerator at 4 °C for 2–4 hours to ensure homogeneity. The resulting solution was then diluted with 3.0 mL of the 20 mM sodium phosphate buffer solution pH 7.0, mixed by gently withdrawing and expelling the solution five times using a 1000- $\mu\text{L}$  Pipetman P1000 pipette. Then 4.0 mL of the mixed solution was transferred to a 250-mL or 100-mL reagent bottle containing an appropriate amount of the 20 mM sodium phosphate buffer solution pH 7.0 to make an *eeAChE* stock solution with a concentration of 0.625  $\mu\text{g}/\text{mL}$ , 2.500  $\mu\text{g}/\text{mL}$ , 5.000  $\mu\text{g}/\text{mL}$ , 7.500  $\mu\text{g}/\text{mL}$ , or 15.000  $\mu\text{g}/\text{mL}$ . The enzyme solution was then mixed by gently withdrawing and expelling the solution 20 times using a 1000- $\mu\text{L}$  Pipetman P1000 pipette and kept in a refrigerator at 4 °C for 2–4 hours to ensure homogeneity. The enzyme solution was lastly distributed to 50 1.5-mL microcentrifuge tubes that were then stored in a refrigerator at 4 °C for at least three hours for subsequent enzyme kinetics studies that must be performed within 30 days.

**The phosphate buffer for preparing enzyme solutions.** To a 100-mL reagent bottle with 100 mL of 50 mM sodium phosphate buffer pH 8.0, 0.11 g of Triton X-100 was added. The resulting solution was stirred for 30 minutes before enzyme inhibition assay and kept stirring during the entire period of the assay. Note: Discard the remaining of the buffer solution after each enzyme inhibition assay.

**Enzyme solutions.** To a 25-mL disposable Matrix™ Reagent Reservoir that was located in the vicinity of the Microplate Reader for measuring *eeAChE* activity, 13.5 mL of 50 mM sodium phosphate buffer pH 8.0 with 0.1% (v/v) Triton X-100 was transferred using a 25-mL disposable pipette and an Eppendorf easypet electronic pipette filler. Then 250 µL of an *eeAChE* stock solution with an appropriate concentration (0.625 µg/mL, 2.500 µg/mL, 5.000 µg/mL, 7.500 µg/mL, or 15.000 µg/mL), which had been kept in a refrigerator at 4 °C for at least three hours, was added to the Reservoir using a 1000-µL Pipetman P1000 pipette. The resulting solution was mixed by gently withdrawing and expelling the solution 10 times using the P1000 pipette.

**Specific enzyme activity and  $K_i$  determination.** Briefly, to each of 40 wells in a flat-bottom, clear, 96-well plate was added at 26 °C sequentially 270 µL 50 mM sodium phosphate buffer (pH 8.0) with 0.1% (v/v) Triton X-100, 5 µL *eeAChE* solution (15.000, 7.5000, 5.000, 2.500, or 0.625 µg/mL), 5 µL of inhibitor solutions (for tacrine: 3.0 µM, 1.5 µM, and 0.6 µM for 0.625 µg/mL of *eeAChE* or 6.0 µM, 3.0 µM, and 1.5 µM for 15.000 µg/mL of *eeAChE*; for bis(7)-tacrine: 0.6 nM, 0.3 nM, and 0.15 nM for 0.625 µg/mL of *eeAChE* or 90 nM, 60 nM, and 30 nM for 15.000 µg/mL of *eeAChE*) or distilled water (for control and the specific enzyme activity determination), 10 µL 2.5 mM DTNB, and 10 µL ATCh solutions (15.000, 7.500, 3.750, 1.875, and 0.938 mM). The resulting solutions were left on the bench at 26 °C for equilibration for 2 minutes and then measured for ATCh hydrolysis rate ( $v$ ) at a microplate reader temperature of  $26 \pm 2$  °C. The specific enzyme activity (SEA) for *eeAChE* was calculated according to  $SEA = (A \cdot V) / (\epsilon \cdot L \cdot T \cdot W_E)$ , where  $A$  was the UV absorption of the ATCh hydrolysis product ( $0.21$ – $1.26 \times 10^{-3}$  OD);  $V$  was the volume of the assay solution (300 µL);  $\epsilon$  was molar absorptivity at 405 nm ( $13.3 \text{ L} \cdot \text{cm}^{-1} \cdot \text{mol}^{-1}$ );  $L$  was the length of the light path of the flat-bottom, clear, 96-well plate (0.75 cm);  $T$  was the time over which the hydrolysis product was generated (10 minutes);  $W_E$  was the weight of the enzyme ( $10.4 \times 10^{-6}$ – $250 \times 10^{-6}$  mg); 1U is defined as converting 1

$\mu\text{mol}$  of substrate to its product in a minute<sup>4</sup>.  $K_i$  was obtained from  $1/v$ ,  $1/[\text{ATCh}]$ , and  $[\text{I}]$  using Prism 4 with the Lineweaver-Burk plot<sup>5</sup> (see details below).

For each new batch of *eeAChE*, UV absorbance of the assay solution was measured at 10-second intervals to determine whether  $v$  reached plateau over the 10-minute period (or determine whether  $r^2 < 1.0$  for the curve of the absorbance over time) first using *eeAChE* at a stock concentration of 15  $\mu\text{g}/\text{mL}$  and ATCh at a stock concentration of 15.000 mM. If a plateau was observed, the 15  $\mu\text{g}/\text{mL}$  *eeAChE* solution was repeatedly diluted by two fold until  $v$  remained constant (or determine whether  $r^2 = 1.0$  for the curve of the absorbance over time) and in the range of  $30\text{--}80 \times 10^{-3}$  OD/min. Then, the UV absorbance was measured at 10-second intervals over the 10-minute period to determine whether  $v$  was in the range of  $10\text{--}20 \times 10^{-3}$  OD/min using a diluted *eeAChE* solution (15.000, 7.500, 5.000, 2.500, or 0.625  $\mu\text{g}/\text{mL}$ ) and five ATCh concentrations (15.000, 7.500, 3.750, 1.875, and 0.938 mM). Any ATCh concentration (typically the 0.938 mM concentration) that causes  $v < 10 \times 10^{-3}$  OD/min was excluded. Consequently,  $v$  was determined using either five ATCh concentrations (15.000, 7.500, 3.750, 1.875, and 0.938 mM) or four ATCh concentrations (15.000, 7.500, 3.750, and 1.875 mM). Three inhibitor concentrations (initially 0.1, 1.0, and 10.0 times the estimated  $K_i$  concentration) were used to determine the percentage of enzyme inhibition. The three concentrations were modified repeatedly until the ATCh hydrolysis rates in the presence of the three modified inhibitor concentrations were reduced to  $\sim 20\%$ ,  $\sim 50\%$ , and  $\sim 80\%$  of the rate in the absence of an inhibitor, respectively.

Under the assay conditions described above (temperature at 26 °C, pH of 8.0, ionic strength of 50 mM sodium phosphate buffer, and ATCh concentration of 15.000 mM), the ATCh hydrolysis rates in the absence of *eeAChE* of two identical Ellman assay solutions (two duplicates) were found to be  $0.375 \times 10^{-3}$  OD/min and  $0.243 \times 10^{-3}$  OD/min, whereas the corresponding ones in the presence of *eeAChE* were  $32.872 \times 10^{-3}$  OD/min and  $31.633 \times 10^{-3}$  OD/min. Therefore, as described below the



ATCh hydrolysis rate in the absence of *ee*AChE were not measured because of its insignificant contribution to the ATCh hydrolysis rate in the presence of *ee*AChE.

Step 1: 5  $\mu$ L of distilled water was added to all wells of Columns 2–3 and Rows 2–6 of a flat-bottom, clear, 96-well plate using a Finnpiquette F1 1–10- $\mu$ L 8-channel pipette. Step 2: 5  $\mu$ L of the low inhibitor concentration was added well by well to all wells of Columns 4–5 and Rows 2–6 using an Eppendorf Reference series adjustable-volume 0.5–10  $\mu$ L pipette. Step 3: 5  $\mu$ L of the median inhibitor concentration was added well by well to all wells of Columns 6–7 and Rows 2–6 using the 0.5–10  $\mu$ L pipette. Step 4: 5  $\mu$ L of the high inhibitor concentration was added well by well to all wells of Columns 8–9 and Rows 2–6 using the 0.5–10  $\mu$ L pipette. Step 5: 275  $\mu$ L of an enzyme solution (0.625  $\mu$ g/mL, 2.500  $\mu$ g/mL, 5.000  $\mu$ g/mL, 7.500  $\mu$ g/mL, or 15.000  $\mu$ g/mL) was added column by column starting from Column 2 to all wells of Columns 2–9 and Rows 2–6 using an Eppendorf Research 8-channel 30–300- $\mu$ L pipette (it took  $\sim$ 3 seconds to complete the enzyme addition to each column). Step 6: A timer was set to count the incubation time of the Column-2 wells upon adding the enzyme solution. Step 7: The solutions in each row were stirred in circle 6 times, starting from Row 2 to Row 9, using a Finnpiquette F1 1–10- $\mu$ L 8-channel pipette with the same set of Fisherbrand low-retention pipette tips. Step 8: When the timer reached 4 minutes, 10  $\mu$ L of DTNB was added column by column starting from Column 2 to all wells of Columns 2–9 and Rows 2–6 using a Finnpiquette F1 1–10- $\mu$ L 8-channel pipette with the same set of Fisherbrand low-retention pipette tips (it took  $\sim$ 3 seconds to complete the DTNB addition to each column). Step 9: When the timer reached 5 minutes, 10  $\mu$ L of five ATCh solutions (15.000 mM to Row 2, ... and 0.938 mM to Row 6) were added column by column starting from Column 2 to all wells of Columns 2–9 and Rows 2–6 using a Finnpiquette F1 1–10- $\mu$ L 8-channel pipette with a new set of Fisherbrand low-retention pipette tips for each row (it took  $\sim$ 10 seconds to complete the ATCh addition and mixing of each column). Upon addition of ATCh, all solutions of each column were mixed by withdrawing and expelling the

solutions 5 times using the same set of pipette tips as those for adding ATCh followed by stirring the solution in circle 5 times using the same set of pipette tips. Step 10: The timer was reset to count the reaction time of the first column wells upon adding ATCh to the last column cells. Step 11: When the timer reached 2 minutes, the plate of solutions was placed in a microplate reader. The ATCh hydrolysis rates of the plate were determined by measuring the UV absorbance in optical density (OD) of an assay solution at 405 nm at 10-second intervals over a period of 10 minutes at plate reader temperature of  $26 \pm 2$  °C using (1) autocalibration, (2) no automix, (3) no blanking, and (4) the basic kinetic assay protocol available in the SoftMax Pro 4.7.1 program. An average of two ATCh hydrolysis rates of duplicated assay solutions was used for  $K_i$  calculation. Each  $K_i$  listed in Tables 1 and 2 was an average of five independent and consecutively performed  $K_i$  determinations using freshly prepared solutions of enzyme, inhibitor, and Ellman assay reagents.

**UV absorptions of inhibitor solutions that were prepared using glass or plastic vials.** To a single quartz cuvette that was washed with distilled water and dried by blowing  $N_2$  gas, 3.0 mL of a tacrine or bis(7)-tacrine solution of 30.0  $\mu$ M, 20.0  $\mu$ M, 15.0  $\mu$ M, 10.0  $\mu$ M, 7.5  $\mu$ M, or 5.0  $\mu$ M was added using a 1000- $\mu$ L Pipetman P1000 pipette. The cuvette with the highest tacrine or bis(7)-tacrine concentration that was prepared using two 2.0-mL microcentrifuge tubes was first placed in the SpectraMax Plus 384 Absorbance Microplate Reader to scan for  $\lambda_{max}$  in the range of 190–400 nm. The  $\lambda_{max}$ s for tacrine and bis(7)-tacrine were found to be 242 nm and 244 nm, respectively. The UV absorption of an inhibitor solution that was prepared using two 2.0-mL microcentrifuge tube or a 7.4-mL glass vial was then determined by the observed absorbance of an inhibitor solution with or without 0.4% (v/v) Polysorbate 20 subtracted by the observed absorbance of distilled water with 0.4% (v/v) Polysorbate 20 or distilled water without 0.4% (v/v) Polysorbate 20. The UV absorbance data are listed in Table S2. The UV absorbance of an inhibitor at each concentration shown in Figure 1 was an average of at least three measurements each of which used a freshly prepared inhibitor solution.

Table S1. ATCh hydrolysis rate ( $v$ ), inhibition constant ( $K_i$ ), and specific enzyme activity (SEA) for tacrine (THA) and bis(7)-tacrine (B7T) against *Electrophorus electricus* acetylcholinesterase (*eeAChE*).

| Tacrine in plastic vial with 10.4 $\mu$ g <i>eeAChE</i> |               |         |              |         |                |        |              |        |               |               |
|---------------------------------------------------------|---------------|---------|--------------|---------|----------------|--------|--------------|--------|---------------|---------------|
| Experiment 1                                            |               |         |              |         |                |        |              |        |               |               |
| [ATCh]<br>(mM)                                          | $v$ (mOD/min) |         |              |         |                |        |              |        | $K_i$<br>(nM) | SEA<br>(U/mg) |
|                                                         | 0 nM of THA   |         | 10 nM of THA |         | 25 nM of THA   |        | 50 nM of THA |        |               |               |
| 15.00                                                   | 34.174        | 36.900  | 25.261       | 25.253  | 15.859         | 17.029 | 10.665       | 8.667  | 8.46 nM       | 342.0         |
| 7.50                                                    | 33.280        | 32.234  | 21.628       | 19.588  | 12.910         | 12.231 | 8.107        | 8.304  |               |               |
| 3.75                                                    | 26.781        | 22.933  | 15.407       | 14.499  | 8.696          | 8.613  | 5.804        | 6.125  |               |               |
| 1.88                                                    | 18.805        | 16.850  | 10.436       | 9.880   | 5.815          | 5.375  | 3.536        | 3.061  |               |               |
| 0.94                                                    | 11.220        | 10.811  | 6.628        | 5.877   | 3.368          | 3.318  | 1.790        | 2.275  |               |               |
| Experiment 2                                            |               |         |              |         |                |        |              |        |               |               |
| [ATCh]<br>(mM)                                          | $v$ (mOD/min) |         |              |         |                |        |              |        | $K_i$<br>(nM) | SEA<br>(U/mg) |
|                                                         | 0 nM of THA   |         | 10 nM of THA |         | 25 nM of THA   |        | 50 nM of THA |        |               |               |
| 15.00                                                   | 35.679        | 38.069  | 25.103       | 26.987  | 15.360         | 19.001 | 11.975       | 14.698 | 12.42         | 354.9         |
| 7.50                                                    | 36.293        | 31.537  | 21.496       | 19.610  | 13.989         | 14.347 | 9.033        | 9.794  |               |               |
| 3.75                                                    | 27.704        | 25.956  | 16.914       | 15.826  | 11.427         | 10.134 | 7.012        | 6.993  |               |               |
| 1.88                                                    | 19.078        | 18.265  | 11.620       | 11.304  | 7.299          | 6.624  | 4.257        | 4.469  |               |               |
| 0.94                                                    | 11.728        | 11.811  | 7.212        | 6.812   | 4.409          | 4.182  | 2.531        | 2.819  |               |               |
| Experiment 3                                            |               |         |              |         |                |        |              |        |               |               |
| [ATCh]<br>(mM)                                          | $v$ (mOD/min) |         |              |         |                |        |              |        | $K_i$<br>(nM) | SEA<br>(U/mg) |
|                                                         | 0 nM of THA   |         | 10 nM of THA |         | 25 nM of THA   |        | 50 nM of THA |        |               |               |
| 15.00                                                   | 31.680        | 34.521  | 23.879       | 22.506  | 16.709         | 16.874 | 11.207       | 11.012 | 12.90         | 318.6         |
| 7.50                                                    | 31.650        | 30.283  | 17.375       | 18.727  | 13.114         | 11.488 | 8.131        | 7.867  |               |               |
| 3.75                                                    | 26.684        | 24.739  | 15.722       | 15.330  | 9.191          | 9.362  | 5.764        | 6.920  |               |               |
| 1.88                                                    | 18.434        | 17.286  | 10.811       | 10.233  | 6.126          | 6.045  | 4.029        | 3.937  |               |               |
| 0.94                                                    | 11.962        | 10.181  | 6.783        | 6.529   | 3.979          | 3.518  | 2.384        | 2.633  |               |               |
| Experiment 4                                            |               |         |              |         |                |        |              |        |               |               |
| [ATCh]<br>(mM)                                          | $v$ (mOD/min) |         |              |         |                |        |              |        | $K_i$<br>(nM) | SEA<br>(U/mg) |
|                                                         | 0 nM of THA   |         | 10 nM of THA |         | 25 nM of THA   |        | 50 nM of THA |        |               |               |
| 15.00                                                   | 38.326        | 35.205  | 22.415       | 23.356  | 15.157         | 13.232 | 9.948        | 9.089  | 8.93 nM       | 353.8         |
| 7.50                                                    | 35.941        | 33.166  | 20.243       | 18.479  | 11.496         | 10.112 | 6.650        | 6.675  |               |               |
| 3.75                                                    | 29.594        | 27.291  | 16.256       | 14.332  | 8.614          | 7.692  | 4.428        | 4.838  |               |               |
| 1.88                                                    | 20.012        | 19.041  | 11.713       | 10.012  | 5.839          | 5.279  | 3.291        | 3.276  |               |               |
| 0.94                                                    | 12.635        | 12.191  | 7.409        | 6.929   | 3.772          | 3.432  | 2.256        | 2.255  |               |               |
| Experiment 5                                            |               |         |              |         |                |        |              |        |               |               |
| [ATCh]<br>(mM)                                          | $v$ (mOD/min) |         |              |         |                |        |              |        | $K_i$<br>(nM) | SEA<br>(U/mg) |
|                                                         | 0 nM of THA   |         | 10 nM of THA |         | 25 nM of THA   |        | 50 nM of THA |        |               |               |
| 15.00                                                   | 36.835        | 33.803  | 22.989       | 19.017  | 14.723         | 14.400 | 8.440        | 12.151 | 12.32         | 339.9         |
| 7.50                                                    | 36.740        | 30.337  | 22.409       | 18.839  | 11.741         | 13.504 | 6.830        | 8.818  |               |               |
| 3.75                                                    | 28.203        | 26.592  | 14.794       | 14.675  | 9.267          | 8.807  | 5.706        | 5.551  |               |               |
| 1.88                                                    | 18.805        | 18.299  | 10.437       | 9.325   | 5.531          | 5.817  | 3.698        | 3.433  |               |               |
| 0.94                                                    | 11.873        | 11.275  | 6.574        | 6.097   | 4.515          | 4.098  | 2.386        | 2.409  |               |               |
| Tacrine in plastic vial with 41.7 $\mu$ g <i>eeAChE</i> |               |         |              |         |                |        |              |        |               |               |
| Experiment 1                                            |               |         |              |         |                |        |              |        |               |               |
| [ATCh]<br>(mM)                                          | $v$ (mOD/min) |         |              |         |                |        |              |        | $K_i$<br>(nM) | SEA<br>(U/mg) |
|                                                         | 0 nM of THA   |         | 10 nM of THA |         | 12.5 nM of THA |        | 25 nM of THA |        |               |               |
| 15.00                                                   | 126.328       | 126.145 | 112.203      | 104.781 | 82.016         | 85.872 | 67.134       | 67.690 | 13.47         | 303.7         |
| 7.50                                                    | 112.459       | 107.673 | 85.795       | 80.536  | 71.672         | 62.947 | 53.996       | 53.746 |               |               |
| 3.75                                                    | 67.271        | 67.992  | 47.698       | 51.831  | 44.626         | 39.330 | 35.064       | 36.478 |               |               |
| 1.88                                                    | 43.416        | 45.105  | 29.271       | 27.898  | 23.385         | 23.426 | 17.045       | 17.600 |               |               |
| Experiment 2                                            |               |         |              |         |                |        |              |        |               |               |
| [ATCh]<br>(mM)                                          | $v$ (mOD/min) |         |              |         |                |        |              |        | $K_i$<br>(nM) | SEA<br>(U/mg) |
|                                                         | 0 nM of THA   |         | 10 nM of THA |         | 12.5 nM of THA |        | 25 nM of THA |        |               |               |
| 15.00                                                   | 96.323        | 97.120  | 51.656       | 49.279  | 43.457         | 45.131 | 37.716       | 33.494 | 15.3          | 232.7         |
| 7.50                                                    | 80.372        | 80.603  | 44.711       | 40.868  | 37.275         | 32.324 | 32.103       | 30.394 |               |               |
| 3.75                                                    | 58.174        | 58.255  | 32.904       | 34.624  | 32.409         | 31.431 | 25.478       | 25.949 |               |               |
| 1.88                                                    | 30.689        | 37.785  | 19.083       | 19.050  | 16.104         | 16.769 | 12.859       | 12.369 |               |               |
| Experiment 3                                            |               |         |              |         |                |        |              |        |               |               |
| [ATCh]<br>(mM)                                          | $v$ (mOD/min) |         |              |         |                |        |              |        | $K_i$<br>(nM) | SEA<br>(U/mg) |
|                                                         | 0 nM of THA   |         | 10 nM of THA |         | 12.5 nM of THA |        | 25 nM of THA |        |               |               |
| 15.00                                                   | 94.613        | 84.734  | 67.364       | 63.211  | 54.668         | 55.663 | 43.900       | 42.055 | 14.54         | 215.8         |
| 7.50                                                    | 74.025        | 73.543  | 57.983       | 54.464  | 47.302         | 48.202 | 35.462       | 33.446 |               |               |
| 3.75                                                    | 47.499        | 47.829  | 40.028       | 38.386  | 34.190         | 36.438 | 27.973       | 28.169 |               |               |

|                                                    |               |                |                |                |         |         |         |         |               |               |
|----------------------------------------------------|---------------|----------------|----------------|----------------|---------|---------|---------|---------|---------------|---------------|
| 1.88                                               | 30.191        | 32.948         | 21.643         | 20.490         | 18.675  | 19.297  | 12.070  | 13.736  |               |               |
| <b>Experiment 4</b>                                |               |                |                |                |         |         |         |         |               |               |
| [ATCh]<br>(mM)                                     | $v$ (mOD/min) |                |                |                |         |         |         |         | $K_i$<br>(nM) | SEA<br>(U/mg) |
|                                                    | 0 nM of THA   | 10 nM of THA   | 12.5 nM of THA | 25 nM of THA   |         |         |         |         |               |               |
| 15.00                                              | 85.145        | 88.917         | 66.132         | 64.117         | 48.951  | 49.861  | 43.905  | 42.555  | 14.94         | 209.4         |
| 7.50                                               | 70.976        | 68.905         | 55.633         | 54.282         | 49.636  | 47.944  | 35.777  | 31.424  |               |               |
| 3.75                                               | 43.724        | 44.279         | 36.931         | 37.672         | 34.744  | 33.527  | 24.883  | 21.959  |               |               |
| 1.88                                               | 20.623        | 23.950         | 18.845         | 18.444         | 16.746  | 15.258  | 9.476   | 10.395  |               |               |
| <b>Experiment 5</b>                                |               |                |                |                |         |         |         |         |               |               |
| [ATCh]<br>(mM)                                     | $v$ (mOD/min) |                |                |                |         |         |         |         | $K_i$<br>(nM) | SEA<br>(U/mg) |
|                                                    | 0 nM of THA   | 10 nM of THA   | 12.5 nM of THA | 25 nM of THA   |         |         |         |         |               |               |
| 15.00                                              | 71.627        | 65.127         | 50.1835        | 47.682         | 41.827  | 40.1835 | 33.157  | 31.062  | 14.87         | 164.5         |
| 7.50                                               | 55.6175       | 56.607         | 40.456         | 43.682         | 34.682  | 36.827  | 25.1185 | 25.0025 |               |               |
| 3.75                                               | 36.178        | 35.3445        | 29.482         | 29.1805        | 27.6575 | 26.1835 | 21.0175 | 21.111  |               |               |
| 1.88                                               | 23.178        | 24.3435        | 15.7945        | 15.9925        | 13.999  | 14.0127 | 9.656   | 9.6175  |               |               |
| <b>Tacrine in plastic vial with 83.3 pg eeAChE</b> |               |                |                |                |         |         |         |         |               |               |
| <b>Experiment 1</b>                                |               |                |                |                |         |         |         |         |               |               |
| [ATCh]<br>(mM)                                     | $v$ (mOD/min) |                |                |                |         |         |         |         | $K_i$<br>(nM) | SEA<br>(U/mg) |
|                                                    | 0 nM of THA   | 12.5 nM of THA | 25.0 nM of THA | 50.0 nM of THA |         |         |         |         |               |               |
| 15.00                                              | 92.616        | 87.109         | 67.311         | 65.749         | 55.839  | 57.102  | 39.613  | 41.090  | 31.19 nM      | 108.1         |
| 7.50                                               | 87.347        | 84.078         | 60.412         | 58.810         | 45.326  | 45.586  | 32.368  | 33.022  |               |               |
| 3.75                                               | 63.608        | 59.347         | 43.785         | 42.045         | 32.764  | 33.382  | 24.239  | 24.583  |               |               |
| 1.88                                               | 42.463        | 40.789         | 30.224         | 29.125         | 22.780  | 22.168  | 16.270  | 16.759  |               |               |
| <b>Experiment 2</b>                                |               |                |                |                |         |         |         |         |               |               |
| [ATCh]<br>(mM)                                     | $v$ (mOD/min) |                |                |                |         |         |         |         | $K_i$<br>(nM) | SEA<br>(U/mg) |
|                                                    | 0 nM of THA   | 12.5 nM of THA | 25.0 nM of THA | 50.0 nM of THA |         |         |         |         |               |               |
| 15.00                                              | 117.283       | 108.629        | 84.339         | 82.532         | 59.749  | 58.562  | 44.253  | 42.716  | 31.21 nM      | 135.9         |
| 7.50                                               | 114.115       | 101.242        | 71.712         | 71.812         | 53.885  | 56.045  | 38.631  | 36.789  |               |               |
| 3.75                                               | 85.132        | 66.856         | 61.590         | 58.181         | 42.409  | 42.130  | 29.830  | 29.462  |               |               |
| 1.88                                               | 59.306        | 60.132         | 44.061         | 43.154         | 32.121  | 32.195  | 23.067  | 23.065  |               |               |
| <b>Experiment 3</b>                                |               |                |                |                |         |         |         |         |               |               |
| [ATCh]<br>(mM)                                     | $v$ (mOD/min) |                |                |                |         |         |         |         | $K_i$<br>(nM) | SEA<br>(U/mg) |
|                                                    | 0 nM of THA   | 12.5 nM of THA | 25.0 nM of THA | 50.0 nM of THA |         |         |         |         |               |               |
| 15.00                                              | 116.124       | 119.042        | 99.358         | 91.154         | 74.473  | 71.030  | 53.891  | 50.782  | 31.4 nM       | 141.5         |
| 7.50                                               | 107.186       | 105.368        | 84.959         | 78.655         | 62.214  | 57.706  | 39.127  | 41.579  |               |               |
| 3.75                                               | 80.265        | 79.382         | 63.999         | 60.783         | 46.553  | 44.578  | 29.915  | 31.378  |               |               |
| 1.88                                               | 56.675        | 53.762         | 42.907         | 43.453         | 33.579  | 31.457  | 22.164  | 22.879  |               |               |
| <b>Experiment 4</b>                                |               |                |                |                |         |         |         |         |               |               |
| [ATCh]<br>(mM)                                     | $v$ (mOD/min) |                |                |                |         |         |         |         | $K_i$<br>(nM) | SEA<br>(U/mg) |
|                                                    | 0 nM of THA   | 12.5 nM of THA | 25.0 nM of THA | 50.0 nM of THA |         |         |         |         |               |               |
| 15.00                                              | 96.685        | 89.941         | 75.897         | 72.361         | 61.062  | 61.101  | 46.476  | 48.888  | 38.11 nM      | 112.3         |
| 7.50                                               | 86.094        | 84.450         | 61.189         | 63.428         | 42.652  | 48.514  | 39.479  | 39.509  |               |               |
| 3.75                                               | 63.179        | 60.482         | 43.382         | 45.452         | 36.950  | 30.762  | 24.863  | 29.594  |               |               |
| 1.88                                               | 43.747        | 42.190         | 32.925         | 31.617         | 27.298  | 24.828  | 19.103  | 20.264  |               |               |
| <b>Experiment 5</b>                                |               |                |                |                |         |         |         |         |               |               |
| [ATCh]<br>(mM)                                     | $v$ (mOD/min) |                |                |                |         |         |         |         | $K_i$<br>(nM) | SEA<br>(U/mg) |
|                                                    | 0 nM of THA   | 12.5 nM of THA | 25.0 nM of THA | 50.0 nM of THA |         |         |         |         |               |               |
| 15.00                                              | 107.437       | 91.984         | 72.311         | 71.418         | 57.033  | 54.914  | 39.443  | 38.944  | 29.66 nM      | 120.0         |
| 7.50                                               | 93.065        | 83.547         | 62.612         | 59.724         | 47.043  | 43.859  | 32.100  | 32.580  |               |               |
| 3.75                                               | 66.045        | 63.627         | 45.445         | 45.244         | 34.759  | 34.958  | 24.355  | 24.152  |               |               |
| 1.88                                               | 46.617        | 45.212         | 31.859         | 31.946         | 24.748  | 24.462  | 17.108  | 17.268  |               |               |
| <b>Tacrine in glass vial with 83.3 pg eeAChE</b>   |               |                |                |                |         |         |         |         |               |               |
| <b>Experiment 1</b>                                |               |                |                |                |         |         |         |         |               |               |
| [ATCh]<br>(mM)                                     | $v$ (mOD/min) |                |                |                |         |         |         |         | $K_i$<br>(nM) | SEA<br>(U/mg) |
|                                                    | 0 nM of THA   | 12.5 nM of THA | 25.0 nM of THA | 50.0 nM of THA |         |         |         |         |               |               |
| 15.00                                              | 112.471       | 109.176        | 104.028        | 104.608        | 95.644  | 104.271 | 88.453  | 91.411  | 38.34 nM      | 133.3         |
| 7.50                                               | 124.437       | 116.819        | 105.279        | 108.668        | 92.646  | 93.805  | 78.058  | 81.122  |               |               |
| 3.75                                               | 88.878        | 89.444         | 75.691         | 78.446         | 68.874  | 67.656  | 56.996  | 57.342  |               |               |
| 1.88                                               | 71.059        | 71.059         | 59.631         | 61.082         | 52.727  | 52.402  | 41.187  | 42.279  |               |               |
| <b>Experiment 2</b>                                |               |                |                |                |         |         |         |         |               |               |
| [ATCh]<br>(mM)                                     | $v$ (mOD/min) |                |                |                |         |         |         |         | $K_i$<br>(nM) | SEA<br>(U/mg) |
|                                                    | 0 nM of THA   | 12.5 nM of THA | 25.0 nM of THA | 50.0 nM of THA |         |         |         |         |               |               |
| 15.00                                              | 89.770        | 70.787         | 64.628         | 62.845         | 56.718  | 55.148  | 41.938  | 46.501  | 36.22 nM      | 96.6          |
| 7.50                                               | 82.644        | 79.399         | 69.603         | 79.330         | 68.149  | 68.342  | 50.868  | 48.621  |               |               |
| 3.75                                               | 50.808        | 54.250         | 48.361         | 53.602         | 46.584  | 46.813  | 37.231  | 33.737  |               |               |
| 1.88                                               | 49.435        | 46.546         | 34.415         | 39.288         | 34.336  | 33.223  | 23.654  | 23.368  |               |               |
| <b>Experiment 3</b>                                |               |                |                |                |         |         |         |         |               |               |

| [ATCh]<br>(mM)                                      | $v$ (mOD/min) |         |                 |         |                 |        |                 |        | $K_i$<br>(nM) | SEA<br>(U/mg) |
|-----------------------------------------------------|---------------|---------|-----------------|---------|-----------------|--------|-----------------|--------|---------------|---------------|
|                                                     | 0 nM of THA   |         | 12.5 nM of THA  |         | 25.0 nM of THA  |        | 50.0 nM of THA  |        |               |               |
| 15.00                                               | 109.273       | 108.514 | 93.352          | 91.403  | 82.079          | 78.659 | 63.312          | 61.502 | 42.88 nM      | 131.0         |
| 7.50                                                | 96.075        | 106.552 | 84.560          | 85.681  | 73.517          | 72.952 | 53.027          | 48.802 |               |               |
| 3.75                                                | 69.512        | 78.260  | 61.157          | 59.509  | 50.644          | 52.083 | 38.855          | 36.161 |               |               |
| 1.88                                                | 50.062        | 55.470  | 43.129          | 43.373  | 37.914          | 38.007 | 26.176          | 27.622 |               |               |
| <b>Experiment 4</b>                                 |               |         |                 |         |                 |        |                 |        |               |               |
| [ATCh]<br>(mM)                                      | $v$ (mOD/min) |         |                 |         |                 |        |                 |        | $K_i$<br>(nM) | SEA<br>(U/mg) |
|                                                     | 0 nM of THA   |         | 12.5 nM of THA  |         | 25.0 nM of THA  |        | 50.0 nM of THA  |        |               |               |
| 15.00                                               | 99.742        | 99.742  | 92.107          | 93.344  | 83.449          | 81.433 | 64.119          | 66.093 | 32.09 nM      | 120.0         |
| 7.50                                                | 84.275        | 84.275  | 77.607          | 76.976  | 64.941          | 63.508 | 48.489          | 52.277 |               |               |
| 3.75                                                | 60.256        | 60.256  | 50.324          | 48.935  | 45.315          | 44.705 | 33.855          | 35.823 |               |               |
| 1.88                                                | 49.349        | 49.349  | 35.252          | 34.157  | 30.111          | 31.282 | 22.449          | 23.544 |               |               |
| <b>Experiment 5</b>                                 |               |         |                 |         |                 |        |                 |        |               |               |
| [ATCh]<br>(mM)                                      | $v$ (mOD/min) |         |                 |         |                 |        |                 |        | $K_i$<br>(nM) | SEA<br>(U/mg) |
|                                                     | 0 nM of THA   |         | 12.5 nM of THA  |         | 25.0 nM of THA  |        | 50.0 nM of THA  |        |               |               |
| 15.00                                               | 112.249       | 100.939 | 95.599          | 105.538 | 90.135          | 98.478 | 74.572          | 64.618 | 27.67 nM      | 128.2         |
| 7.50                                                | 114.370       | 90.131  | 87.209          | 91.114  | 68.086          | 75.571 | 54.262          | 45.487 |               |               |
| 3.75                                                | 84.340        | 67.113  | 60.035          | 53.497  | 42.937          | 44.401 | 29.728          | 28.738 |               |               |
| 1.88                                                | 43.506        | 43.506  | 38.074          | 33.301  | 27.646          | 26.743 | 19.633          | 18.496 |               |               |
| <b>Tacrine in plastic vial with 125.0 pg eeAChE</b> |               |         |                 |         |                 |        |                 |        |               |               |
| <b>Experiment 1</b>                                 |               |         |                 |         |                 |        |                 |        |               |               |
| [ATCh]<br>(mM)                                      | $v$ (mOD/min) |         |                 |         |                 |        |                 |        | $K_i$<br>(nM) | SEA<br>(U/mg) |
|                                                     | 0 nM of THA   |         | 16.67 nM of THA |         | 33.33 nM of THA |        | 66.67 nM of THA |        |               |               |
| 15.00                                               | 62.804        | 47.128  | 41.149          | 43.312  | 39.302          | 39.617 | 31.254          | 29.366 | 42.12 nM      | 44.1          |
| 7.50                                                | 44.964        | 35.936  | 34.335          | 37.962  | 34.011          | 33.211 | 21.908          | 22.125 |               |               |
| 3.75                                                | 28.530        | 27.805  | 22.210          | 22.883  | 19.876          | 19.552 | 13.293          | 14.722 |               |               |
| 1.88                                                | 24.532        | 22.404  | 18.303          | 18.693  | 16.058          | 15.923 | 10.168          | 11.586 |               |               |
| <b>Experiment 2</b>                                 |               |         |                 |         |                 |        |                 |        |               |               |
| [ATCh]<br>(mM)                                      | $v$ (mOD/min) |         |                 |         |                 |        |                 |        | $K_i$<br>(nM) | SEA<br>(U/mg) |
|                                                     | 0 nM of THA   |         | 16.67 nM of THA |         | 33.33 nM of THA |        | 66.67 nM of THA |        |               |               |
| 15.00                                               | 36.770        | 30.636  | 26.243          | 32.066  | 26.563          | 26.818 | 16.896          | 18.273 | 44.10 nM      | 27.0          |
| 7.50                                                | 34.847        | 35.850  | 22.014          | 28.107  | 21.524          | 21.285 | 15.008          | 15.264 |               |               |
| 3.75                                                | 25.630        | 26.113  | 16.305          | 18.394  | 11.678          | 10.435 | 9.632           | 9.823  |               |               |
| 1.88                                                | 13.812        | 14.838  | 10.097          | 11.909  | 7.657           | 9.733  | 6.254           | 6.121  |               |               |
| <b>Experiment 3</b>                                 |               |         |                 |         |                 |        |                 |        |               |               |
| [ATCh]<br>(mM)                                      | $v$ (mOD/min) |         |                 |         |                 |        |                 |        | $K_i$<br>(nM) | SEA<br>(U/mg) |
|                                                     | 0 nM of THA   |         | 16.67 nM of THA |         | 33.33 nM of THA |        | 66.67 nM of THA |        |               |               |
| 15.00                                               | 49.874        | 46.297  | 32.138          | 36.806  | 27.317          | 25.653 | 23.362          | 20.067 | 46.42 nM      | 38.6          |
| 7.50                                                | 40.727        | 36.943  | 29.357          | 30.104  | 24.911          | 20.362 | 19.456          | 18.058 |               |               |
| 3.75                                                | 26.661        | 34.521  | 19.110          | 21.922  | 17.311          | 17.504 | 13.533          | 14.204 |               |               |
| 1.88                                                | 18.431        | 19.418  | 13.684          | 11.626  | 10.169          | 10.322 | 7.507           | 8.036  |               |               |
| <b>Experiment 4</b>                                 |               |         |                 |         |                 |        |                 |        |               |               |
| [ATCh]<br>(mM)                                      | $v$ (mOD/min) |         |                 |         |                 |        |                 |        | $K_i$<br>(nM) | SEA<br>(U/mg) |
|                                                     | 0 nM of THA   |         | 16.67 nM of THA |         | 33.33 nM of THA |        | 66.67 nM of THA |        |               |               |
| 15.00                                               | 72.256        | 74.932  | 51.630          | 51.709  | 41.897          | 43.794 | 36.225          | 40.637 | 44.40 nM      | 59.0          |
| 7.50                                                | 51.839        | 55.217  | 35.361          | 39.133  | 30.585          | 33.840 | 33.259          | 29.778 |               |               |
| 3.75                                                | 46.694        | 40.504  | 27.981          | 29.784  | 26.177          | 28.239 | 22.309          | 22.338 |               |               |
| 1.88                                                | 33.493        | 31.747  | 21.255          | 20.174  | 18.022          | 18.013 | 15.801          | 14.312 |               |               |
| <b>Experiment 5</b>                                 |               |         |                 |         |                 |        |                 |        |               |               |
| [ATCh]<br>(mM)                                      | $v$ (mOD/min) |         |                 |         |                 |        |                 |        | $K_i$<br>(nM) | SEA<br>(U/mg) |
|                                                     | 0 nM of THA   |         | 16.67 nM of THA |         | 33.33 nM of THA |        | 66.67 nM of THA |        |               |               |
| 15.00                                               | 83.027        | 72.257  | 52.591          | 55.459  | 45.430          | 42.637 | 39.483          | 39.972 | 46.20 nM      | 62.3          |
| 7.50                                                | 52.913        | 54.894  | 34.151          | 32.598  | 33.758          | 29.520 | 27.721          | 28.352 |               |               |
| 3.75                                                | 42.208        | 45.359  | 31.989          | 32.116  | 28.645          | 29.249 | 23.684          | 27.288 |               |               |
| 1.88                                                | 34.873        | 34.156  | 22.436          | 20.325  | 18.666          | 19.932 | 15.784          | 15.708 |               |               |
| <b>Tacrine in plastic vial with 250.0 pg eeAChE</b> |               |         |                 |         |                 |        |                 |        |               |               |
| <b>Experiment 1</b>                                 |               |         |                 |         |                 |        |                 |        |               |               |
| [ATCh]<br>(mM)                                      | $v$ (mOD/min) |         |                 |         |                 |        |                 |        | $K_i$<br>(nM) | SEA<br>(U/mg) |
|                                                     | 0 nM of THA   |         | 25 nM of THA    |         | 50 nM of THA    |        | 100 nM of THA   |        |               |               |
| 15.00                                               | 70.503        | 77.549  | 74.195          | 59.114  | 42.685          | 43.240 | 37.128          | 42.021 | 65.94 nM      | 29.7          |
| 7.50                                                | 45.766        | 45.549  | 39.603          | 39.680  | 25.491          | 24.116 | 23.531          | 20.931 |               |               |
| 3.75                                                | 23.723        | 29.695  | 20.315          | 16.834  | 13.078          | 13.392 | 8.924           | 13.019 |               |               |
| 1.88                                                | 15.241        | 17.935  | 11.673          | 12.084  | 8.637           | 7.899  | 6.145           | 7.434  |               |               |
| <b>Experiment 2</b>                                 |               |         |                 |         |                 |        |                 |        |               |               |
| [ATCh]<br>(mM)                                      | $v$ (mOD/min) |         |                 |         |                 |        |                 |        | $K_i$<br>(nM) | SEA<br>(U/mg) |
|                                                     | 0 nM of THA   |         | 25 nM of THA    |         | 50 nM of THA    |        | 100 nM of THA   |        |               |               |

|                                                         |             |                |        |                |        |               |        |        |                        |               |
|---------------------------------------------------------|-------------|----------------|--------|----------------|--------|---------------|--------|--------|------------------------|---------------|
| 15.00                                                   | 36.770      | 30.636         | 26.243 | 32.066         | 26.563 | 26.818        | 16.896 | 18.273 | 66.14 nM               | 13.5          |
| 7.50                                                    | 34.847      | 35.850         | 22.014 | 28.107         | 21.524 | 21.285        | 15.008 | 15.264 |                        |               |
| 3.75                                                    | 25.630      | 26.113         | 16.305 | 18.394         | 11.678 | 10.435        | 9.632  | 9.823  |                        |               |
| 1.88                                                    | 13.812      | 14.838         | 10.097 | 11.909         | 7.657  | 9.733         | 6.254  | 6.121  |                        |               |
| <b>Experiment 3</b>                                     |             |                |        |                |        |               |        |        |                        |               |
| [ATCh]<br>(mM)                                          | v (mOD/min) |                |        |                |        |               |        |        | K <sub>i</sub><br>(nM) | SEA<br>(U/mg) |
|                                                         | 0 nM of THA | 25 nM of THA   |        | 50 nM of THA   |        | 100 nM of THA |        |        |                        |               |
| 15.00                                                   | 77.077      | 68.433         | 57.570 | 54.857         | 49.325 | 49.350        | 42.128 | 42.021 | 71.30 nM               | 29.2          |
| 7.50                                                    | 68.437      | 70.891         | 48.460 | 44.274         | 31.894 | 36.733        | 23.531 | 24.931 |                        |               |
| 3.75                                                    | 26.819      | 31.812         | 25.907 | 25.351         | 18.148 | 18.358        | 15.924 | 13.019 |                        |               |
| 1.88                                                    | 25.432      | 25.665         | 18.458 | 17.902         | 13.335 | 15.698        | 11.145 | 10.434 |                        |               |
| <b>Experiment 4</b>                                     |             |                |        |                |        |               |        |        |                        |               |
| [ATCh]<br>(mM)                                          | v (mOD/min) |                |        |                |        |               |        |        | K <sub>i</sub><br>(nM) | SEA<br>(U/mg) |
|                                                         | 0 nM of THA | 25 nM of THA   |        | 50 nM of THA   |        | 100 nM of THA |        |        |                        |               |
| 15.00                                                   | 76.989      | 75.239         | 49.991 | 64.601         | 56.098 | 48.012        | 43.720 | 44.258 | 68.32 nM               | 30.5          |
| 7.50                                                    | 65.181      | 61.110         | 43.135 | 47.886         | 41.706 | 36.170        | 30.745 | 31.487 |                        |               |
| 3.75                                                    | 58.060      | 55.019         | 34.591 | 33.879         | 25.064 | 25.802        | 20.971 | 18.568 |                        |               |
| 1.88                                                    | 22.673      | 22.976         | 15.504 | 15.272         | 12.911 | 12.181        | 9.411  | 9.979  |                        |               |
| <b>Experiment 5</b>                                     |             |                |        |                |        |               |        |        |                        |               |
| [ATCh]<br>(mM)                                          | v (mOD/min) |                |        |                |        |               |        |        | K <sub>i</sub><br>(nM) | SEA<br>(U/mg) |
|                                                         | 0 nM of THA | 25 nM of THA   |        | 50 nM of THA   |        | 100 nM of THA |        |        |                        |               |
| 15.00                                                   | 77.059      | 75.383         | 50.798 | 63.086         | 54.774 | 47.428        | 42.646 | 43.053 | 89.96 nM               | 30.6          |
| 7.50                                                    | 50.900      | 49.470         | 39.214 | 41.698         | 37.861 | 33.800        | 22.599 | 22.121 |                        |               |
| 3.75                                                    | 28.678      | 20.482         | 24.677 | 24.634         | 22.860 | 21.061        | 15.368 | 15.166 |                        |               |
| 1.88                                                    | 16.205      | 15.152         | 10.778 | 10.805         | 10.760 | 9.773         | 7.038  | 7.188  |                        |               |
| 1.25                                                    |             |                |        |                |        |               |        |        |                        |               |
| <b>Bis(7)-tacrine in glass vial with 10.4 pg eeAChE</b> |             |                |        |                |        |               |        |        |                        |               |
| <b>Experiment 1</b>                                     |             |                |        |                |        |               |        |        |                        |               |
| [ATCh]<br>(mM)                                          | v (mOD/min) |                |        |                |        |               |        |        | K <sub>i</sub><br>(nM) | SEA<br>(U/mg) |
|                                                         | 0 nM of B7T | 0.83 nM of B7T |        | 1.67 nM of B7T |        | 3.3 nM of B7T |        |        |                        |               |
| 15.00                                                   | 24.415      | 25.740         | 21.561 | 21.257         | 18.569 | 17.222        | 14.663 | 15.335 | 3.16 nM                | 344.8         |
| 7.50                                                    | 19.934      | 19.405         | 15.374 | 15.913         | 13.039 | 12.920        | 10.495 | 10.850 |                        |               |
| 3.75                                                    | 13.743      | 14.189         | 11.657 | 11.311         | 9.445  | 9.530         | 7.646  | 7.964  |                        |               |
| 1.88                                                    | 9.740       | 9.150          | 7.467  | 7.805          | 6.258  | 6.361         | 4.797  | 4.171  |                        |               |
| 1.25                                                    | 7.727       | 7.650          | 6.096  | 6.205          | 5.346  | 4.991         | 4.208  | 3.983  |                        |               |
| <b>Experiment 2</b>                                     |             |                |        |                |        |               |        |        |                        |               |
| [ATCh]<br>(mM)                                          | v (mOD/min) |                |        |                |        |               |        |        | K <sub>i</sub><br>(nM) | SEA<br>(U/mg) |
|                                                         | 0 nM of B7T | 0.83 nM of B7T |        | 1.67 nM of B7T |        | 3.3 nM of B7T |        |        |                        |               |
| 15.00                                                   | 24.170      | 21.920         | 18.541 | 18.840         | 15.941 | 15.250        | 13.126 | 13.074 | 3.66 nM                | 316.8         |
| 7.50                                                    | 18.926      | 17.794         | 13.004 | 14.217         | 12.346 | 11.358        | 9.555  | 9.682  |                        |               |
| 3.75                                                    | 13.189      | 12.250         | 10.028 | 9.430          | 8.458  | 7.435         | 6.511  | 6.471  |                        |               |
| 1.88                                                    | 7.101       | 7.747          | 6.505  | 6.431          | 5.646  | 4.760         | 3.922  | 4.132  |                        |               |
| 1.25                                                    | 5.989       | 6.003          | 5.081  | 5.124          | 4.312  | 3.691         | 3.292  | 3.229  |                        |               |
| <b>Experiment 3</b>                                     |             |                |        |                |        |               |        |        |                        |               |
| [ATCh]<br>(mM)                                          | v (mOD/min) |                |        |                |        |               |        |        | K <sub>i</sub><br>(nM) | SEA<br>(U/mg) |
|                                                         | 0 nM of B7T | 0.83 nM of B7T |        | 1.67 nM of B7T |        | 3.3 nM of B7T |        |        |                        |               |
| 15.00                                                   | 27.832      | 25.684         | 20.251 | 20.823         | 18.136 | 17.695        | 15.037 | 14.427 | 3.35 nM                | 367.9         |
| 7.50                                                    | 21.839      | 20.382         | 16.731 | 16.655         | 13.679 | 14.349        | 11.066 | 11.518 |                        |               |
| 3.75                                                    | 14.363      | 13.187         | 10.835 | 10.188         | 8.955  | 9.470         | 8.012  | 8.069  |                        |               |
| 1.88                                                    | 10.753      | 10.242         | 7.934  | 7.728          | 6.167  | 6.443         | 5.434  | 5.102  |                        |               |
| 1.25                                                    | 8.463       | 8.158          | 6.300  | 6.307          | 5.110  | 4.891         | 4.484  | 4.072  |                        |               |
| <b>Experiment 4</b>                                     |             |                |        |                |        |               |        |        |                        |               |
| [ATCh]<br>(mM)                                          | v (mOD/min) |                |        |                |        |               |        |        | K <sub>i</sub><br>(nM) | SEA<br>(U/mg) |
|                                                         | 0 nM of B7T | 0.83 nM of B7T |        | 1.67 nM of B7T |        | 3.3 nM of B7T |        |        |                        |               |
| 15.00                                                   | 22.236      | 21.770         | 17.265 | 17.680         | 14.061 | 16.206        | 12.584 | 13.389 | 2.87 nM                | 302.5         |
| 7.50                                                    | 15.060      | 17.561         | 9.562  | 13.586         | 11.009 | 10.673        | 9.149  | 10.064 |                        |               |
| 3.75                                                    | 12.464      | 11.276         | 9.544  | 9.580          | 7.603  | 7.759         | 6.816  | 6.839  |                        |               |
| 1.88                                                    | 9.007       | 8.576          | 6.383  | 6.523          | 5.597  | 5.740         | 4.570  | 4.601  |                        |               |
| 1.25                                                    | 7.219       | 6.896          | 5.017  | 5.086          | 4.290  | 4.382         | 3.566  | 3.328  |                        |               |
| <b>Experiment 5</b>                                     |             |                |        |                |        |               |        |        |                        |               |
| [ATCh]<br>(mM)                                          | v (mOD/min) |                |        |                |        |               |        |        | K <sub>i</sub><br>(nM) | SEA<br>(U/mg) |
|                                                         | 0 nM of B7T | 0.83 nM of B7T |        | 1.67 nM of B7T |        | 3.3 nM of B7T |        |        |                        |               |
| 15.00                                                   | 24.698      | 24.498         | 20.752 | 19.556         | 16.918 | 17.740        | 13.864 | 13.522 | 3.00 nM                | 338.2         |
| 7.50                                                    | 18.558      | 18.729         | 15.787 | 15.045         | 12.618 | 12.798        | 10.186 | 10.305 |                        |               |
| 3.75                                                    | 12.684      | 14.079         | 11.815 | 11.157         | 8.978  | 9.063         | 7.129  | 6.846  |                        |               |
| 1.88                                                    | 7.818       | 10.096         | 7.491  | 7.217          | 5.993  | 5.930         | 4.344  | 4.525  |                        |               |
| 1.25                                                    | 6.467       | 7.126          | 5.436  | 5.367          | 4.429  | 4.300         | 3.411  | 3.369  |                        |               |

| Bis(7)-tacrine in plastic vial with 10.4 pg eeAChE |               |         |                |         |                |        |               |        |               |               |  |
|----------------------------------------------------|---------------|---------|----------------|---------|----------------|--------|---------------|--------|---------------|---------------|--|
| Experiment 1                                       |               |         |                |         |                |        |               |        |               |               |  |
| [ATCh]<br>(mM)                                     | $v$ (mOD/min) |         |                |         |                |        |               |        | $K_i$<br>(pM) | SEA<br>(U/mg) |  |
|                                                    | opM of B7T    |         | 1.25 pM of B7T |         | 2.5pM of B7T   |        | 5.0 pM of B7T |        |               |               |  |
| 15.00                                              | 35.773        | 35.174  | 26.509         | 26.203  | 20.275         | 20.111 | 13.586        | 13.557 | 2.53 pM       | 341.4         |  |
| 10.00                                              | 36.203        | 37.939  | 22.867         | 22.542  | 18.065         | 18.350 | 11.643        | 11.631 |               |               |  |
| 7.50                                               | 30.091        | 32.957  | 19.820         | 19.612  | 14.944         | 14.765 | 10.279        | 10.565 |               |               |  |
| 3.75                                               | 21.575        | 23.518  | 14.254         | 14.819  | 10.791         | 10.211 | 7.020         | 8.076  |               |               |  |
| 1.88                                               | 14.764        | 15.888  | 7.776          | 9.818   | 6.578          | 6.211  | 7.020         | 8.076  |               |               |  |
| Experiment 2                                       |               |         |                |         |                |        |               |        |               |               |  |
| [ATCh]<br>(mM)                                     | $v$ (mOD/min) |         |                |         |                |        |               |        | $K_i$<br>(pM) | SEA<br>(U/mg) |  |
|                                                    | opM of B7T    |         | 1.25 pM of B7T |         | 2.5pM of B7T   |        | 5.0 pM of B7T |        |               |               |  |
| 15.00                                              | 38.545        | 36.973  | 25.166         | 22.094  | 17.428         | 17.071 | 15.738        | 16.053 | 2.87 pM       | 363.4         |  |
| 10.00                                              | 35.754        | 32.711  | 21.429         | 20.131  | 15.133         | 16.758 | 13.506        | 13.404 |               |               |  |
| 7.50                                               | 27.992        | 27.243  | 18.537         | 16.804  | 13.342         | 14.259 | 10.942        | 11.457 |               |               |  |
| 3.75                                               | 23.057        | 22.188  | 13.950         | 11.161  | 9.570          | 9.744  | 7.954         | 5.881  |               |               |  |
| 1.88                                               | 15.035        | 14.820  | 8.849          | 9.165   | 6.570          | 5.923  | 5.895         | 5.058  |               |               |  |
| Experiment 3                                       |               |         |                |         |                |        |               |        |               |               |  |
| [ATCh]<br>(mM)                                     | $v$ (mOD/min) |         |                |         |                |        |               |        | $K_i$<br>(pM) | SEA<br>(U/mg) |  |
|                                                    | opM of B7T    |         | 1.25 pM of B7T |         | 2.5pM of B7T   |        | 5.0 pM of B7T |        |               |               |  |
| 15.00                                              | 38.821        | 34.716  | 15.386         | 13.391  | 11.611         | 15.312 | 11.345        | 11.905 | 2.39 pM       | 353.9         |  |
| 10.00                                              | 25.871        | 34.326  | 18.969         | 11.993  | 10.007         | 12.772 | 9.290         | 9.250  |               |               |  |
| 7.50                                               | 29.426        | 29.218  | 12.257         | 10.383  | 8.366          | 11.150 | 8.285         | 8.232  |               |               |  |
| 3.75                                               | 22.756        | 21.306  | 10.171         | 10.820  | 7.950          | 8.595  | 6.446         | 6.721  |               |               |  |
| 1.88                                               | 15.596        | 14.933  | 7.355          | 6.115   | 4.962          | 5.879  | 4.116         | 4.502  |               |               |  |
| Experiment 4                                       |               |         |                |         |                |        |               |        |               |               |  |
| [ATCh]<br>(mM)                                     | $v$ (mOD/min) |         |                |         |                |        |               |        | $K_i$<br>(pM) | SEA<br>(U/mg) |  |
|                                                    | opM of B7T    |         | 1.25 pM of B7T |         | 2.5pM of B7T   |        | 5.0 pM of B7T |        |               |               |  |
| 15.00                                              | 32.365        | 30.642  | 23.639         | 23.940  | 14.630         | 12.760 | 11.688        | 11.539 | 4.39 pM       | 303.2         |  |
| 10.00                                              | 29.379        | 28.257  | 20.156         | 18.162  | 12.760         | 12.954 | 11.823        | 9.335  |               |               |  |
| 7.50                                               | 26.697        | 25.433  | 18.142         | 18.189  | 12.998         | 12.912 | 9.765         | 10.396 |               |               |  |
| 3.75                                               | 12.083        | 12.646  | 11.343         | 12.271  | 9.256          | 9.285  | 6.741         | 6.611  |               |               |  |
| 1.88                                               | 13.276        | 12.868  | 8.663          | 9.894   | 6.326          | 6.585  | 5.102         | 5.379  |               |               |  |
| Experiment 5                                       |               |         |                |         |                |        |               |        |               |               |  |
| [ATCh]<br>(mM)                                     | $v$ (mOD/min) |         |                |         |                |        |               |        | $K_i$<br>(pM) | SEA<br>(U/mg) |  |
|                                                    | opM of B7T    |         | 1.25 pM of B7T |         | 2.5pM of B7T   |        | 5.0 pM of B7T |        |               |               |  |
| 15.00                                              | 36.689        | 36.147  | 28.995         | 25.920  | 20.649         | 15.863 | 11.313        | 11.775 | 2.52 pM       | 350.5         |  |
| 10.00                                              | 33.208        | 32.235  | 22.339         | 23.028  | 15.461         | 13.155 | 9.300         | 9.310  |               |               |  |
| 7.50                                               | 30.106        | 29.680  | 21.429         | 21.011  | 13.021         | 12.243 | 8.199         | 8.333  |               |               |  |
| 3.75                                               | 20.849        | 20.229  | 14.625         | 14.953  | 9.434          | 9.510  | 6.664         | 6.598  |               |               |  |
| 1.88                                               | 13.786        | 13.552  | 9.764          | 9.195   | 6.472          | 6.713  | 4.310         | 4.351  |               |               |  |
| Bis(7)-tacrine in plastic vial with 41.7 pg eeAChE |               |         |                |         |                |        |               |        |               |               |  |
| Experiment 1                                       |               |         |                |         |                |        |               |        |               |               |  |
| [ATCh]<br>(mM)                                     | $v$ (mOD/min) |         |                |         |                |        |               |        | $K_i$<br>(pM) | SEA<br>(U/mg) |  |
|                                                    | opM of B7T    |         | 25.0 pM of B7T |         | 50.0 pM of B7T |        | 100 pM of B7T |        |               |               |  |
| 15.00                                              | 101.314       | 110.419 | 112.961        | 102.609 | 84.747         | 87.093 | 55.525        | 56.528 | 77.35 pM      | 254.7         |  |
| 7.50                                               | 78.508        | 78.616  | 78.974         | 76.949  | 60.179         | 61.539 | 34.803        | 40.111 |               |               |  |
| 3.75                                               | 56.580        | 56.029  | 50.697         | 46.700  | 38.647         | 31.030 | 23.138        | 24.759 |               |               |  |
| 1.88                                               | 26.560        | 23.481  | 25.080         | 21.663  | 18.502         | 15.982 | 12.230        | 11.664 |               |               |  |
| Experiment 2                                       |               |         |                |         |                |        |               |        |               |               |  |
| [ATCh]<br>(mM)                                     | $v$ (mOD/min) |         |                |         |                |        |               |        | $K_i$<br>(pM) | SEA<br>(U/mg) |  |
|                                                    | opM of B7T    |         | 25.0 pM of B7T |         | 50.0 pM of B7T |        | 100 pM of B7T |        |               |               |  |
| 15.00                                              | 112.879       | 113.048 | 87.433         | 100.587 | 99.448         | 92.107 | 47.152        | 49.586 | 82.88 pM      | 271.8         |  |
| 7.50                                               | 85.021        | 77.867  | 57.794         | 70.665  | 73.657         | 49.802 | 27.680        | 34.249 |               |               |  |
| 3.75                                               | 52.164        | 50.123  | 39.010         | 44.391  | 43.884         | 34.458 | 18.963        | 18.659 |               |               |  |
| 1.88                                               | 24.992        | 25.301  | 21.104         | 22.752  | 21.349         | 15.364 | 11.695        | 11.524 |               |               |  |
| Experiment 3                                       |               |         |                |         |                |        |               |        |               |               |  |
| [ATCh]<br>(mM)                                     | $v$ (mOD/min) |         |                |         |                |        |               |        | $K_i$<br>(pM) | SEA<br>(U/mg) |  |
|                                                    | opM of B7T    |         | 25.0 pM of B7T |         | 50.0 pM of B7T |        | 100 pM of B7T |        |               |               |  |
| 15.00                                              | 104.313       | 104.419 | 86.737         | 91.983  | 75.391         | 62.832 | 64.868        | 52.591 | 84.71 pM      | 251.1         |  |
| 7.50                                               | 75.575        | 76.725  | 61.018         | 56.723  | 59.057         | 64.987 | 43.546        | 38.168 |               |               |  |
| 3.75                                               | 47.758        | 48.123  | 40.950         | 33.521  | 39.328         | 37.618 | 24.155        | 26.779 |               |               |  |
| 1.88                                               | 27.117        | 24.040  | 22.338         | 21.921  | 19.301         | 20.776 | 12.353        | 13.418 |               |               |  |
| Experiment 4                                       |               |         |                |         |                |        |               |        |               |               |  |
| [ATCh]<br>(mM)                                     | $v$ (mOD/min) |         |                |         |                |        |               |        | $K_i$<br>(pM) | SEA<br>(U/mg) |  |
|                                                    | opM of B7T    |         | 25.0 pM of B7T |         | 50.0 pM of B7T |        | 100 pM of B7T |        |               |               |  |
| 15.00                                              | 100.470       | 98.050  | 98.047         | 95.745  | 72.685         | 83.710 | 33.733        | 34.467 | 82.97 pM      | 238.8         |  |

|                                                            |               |         |                |         |                |        |               |        |               |               |
|------------------------------------------------------------|---------------|---------|----------------|---------|----------------|--------|---------------|--------|---------------|---------------|
| 7.50                                                       | 79.828        | 78.500  | 79.484         | 75.764  | 58.418         | 68.301 | 28.855        | 22.755 |               |               |
| 3.75                                                       | 49.690        | 48.100  | 48.007         | 44.051  | 42.476         | 47.197 | 19.411        | 17.825 |               |               |
| 1.88                                                       | 26.837        | 24.817  | 24.199         | 22.453  | 22.255         | 22.035 | 11.966        | 10.133 |               |               |
| <b>Experiment 5</b>                                        |               |         |                |         |                |        |               |        |               |               |
| [ATCh]<br>(mM)                                             | $v$ (mOD/min) |         |                |         |                |        |               |        | $K_i$<br>(pM) | SEA<br>(U/mg) |
|                                                            | opM of B7T    |         | 25.0 pM of B7T |         | 50.0 pM of B7T |        | 100 pM of B7T |        |               |               |
| 15.00                                                      | 100.043       | 100.700 | 102.778        | 106.192 | 94.724         | 75.927 | 38.370        | 45.911 | 76.58 pM      | 241.5         |
| 7.50                                                       | 100.959       | 94.172  | 95.219         | 83.940  | 65.644         | 63.585 | 38.392        | 37.933 |               |               |
| 3.75                                                       | 70.647        | 71.073  | 68.880         | 63.633  | 45.021         | 43.693 | 27.812        | 21.408 |               |               |
| 1.88                                                       | 39.346        | 39.342  | 36.809         | 36.702  | 31.853         | 31.248 | 17.886        | 17.168 |               |               |
| <b>Bis(7)-tacrine in plastic vial with 125.0 pg eeAChE</b> |               |         |                |         |                |        |               |        |               |               |
| <b>Experiment 1</b>                                        |               |         |                |         |                |        |               |        |               |               |
| [ATCh]<br>(mM)                                             | $v$ (mOD/min) |         |                |         |                |        |               |        | $K_i$<br>(pM) | SEA<br>(U/mg) |
|                                                            | opM of B7T    |         | 0.25 nM of B7T |         | 0.5 nM of B7T  |        | 1.0 nM of B7T |        |               |               |
| 15.00                                                      | 65.721        | 63.231  | 58.462         | 55.816  | 43.211         | 39.639 | 26.331        | 25.843 | 545.4 pM      | 51.7          |
| 7.50                                                       | 57.109        | 53.983  | 43.025         | 42.062  | 28.708         | 32.097 | 18.979        | 20.656 |               |               |
| 3.75                                                       | 42.793        | 31.909  | 28.183         | 28.050  | 20.436         | 23.590 | 13.975        | 14.899 |               |               |
| 1.88                                                       | 27.127        | 23.520  | 18.794         | 20.491  | 15.809         | 13.036 | 9.645         | 9.128  |               |               |
| <b>Experiment 2</b>                                        |               |         |                |         |                |        |               |        |               |               |
| [ATCh]<br>(mM)                                             | $v$ (mOD/min) |         |                |         |                |        |               |        | $K_i$<br>(pM) | SEA<br>(U/mg) |
|                                                            | opM of B7T    |         | 0.25 nM of B7T |         | 0.5 nM of B7T  |        | 1.0 nM of B7T |        |               |               |
| 15.00                                                      | 55.607        | 54.076  | 47.936         | 49.056  | 39.087         | 36.624 | 25.636        | 18.996 | 441.4 pM      | 44.0          |
| 7.50                                                       | 50.182        | 44.461  | 38.614         | 36.904  | 25.540         | 26.499 | 16.974        | 15.840 |               |               |
| 3.75                                                       | 28.288        | 30.757  | 25.605         | 26.270  | 16.360         | 14.064 | 12.966        | 13.863 |               |               |
| 1.88                                                       | 22.476        | 22.982  | 19.554         | 19.064  | 12.000         | 15.126 | 7.201         | 9.323  |               |               |
| <b>Experiment 3</b>                                        |               |         |                |         |                |        |               |        |               |               |
| [ATCh]<br>(mM)                                             | $v$ (mOD/min) |         |                |         |                |        |               |        | $K_i$<br>(pM) | SEA<br>(U/mg) |
|                                                            | opM of B7T    |         | 0.25 nM of B7T |         | 0.5 nM of B7T  |        | 1.0 nM of B7T |        |               |               |
| 15.00                                                      | 63.203        | 53.775  | 46.564         | 46.123  | 44.387         | 42.346 | 29.180        | 28.006 | 411.1 pM      | 46.9          |
| 7.50                                                       | 49.174        | 45.032  | 32.154         | 33.815  | 32.620         | 32.877 | 16.107        | 16.832 |               |               |
| 3.75                                                       | 24.448        | 28.835  | 21.539         | 23.679  | 17.951         | 17.478 | 12.966        | 13.863 |               |               |
| 1.88                                                       | 22.827        | 22.847  | 17.538         | 16.665  | 15.283         | 14.189 | 7.201         | 9.323  |               |               |
| <b>Experiment 4</b>                                        |               |         |                |         |                |        |               |        |               |               |
| [ATCh]<br>(mM)                                             | $v$ (mOD/min) |         |                |         |                |        |               |        | $K_i$<br>(pM) | SEA<br>(U/mg) |
|                                                            | opM of B7T    |         | 0.25 nM of B7T |         | 0.5 nM of B7T  |        | 1.0 nM of B7T |        |               |               |
| 15.00                                                      | 53.391        | 58.507  | 43.649         | 46.428  | 41.046         | 40.071 | 23.741        | 22.090 | 445.6 pM      | 44.9          |
| 7.50                                                       | 43.881        | 44.880  | 34.635         | 34.846  | 30.262         | 30.509 | 19.173        | 18.868 |               |               |
| 3.75                                                       | 24.448        | 28.835  | 19.232         | 21.229  | 19.799         | 18.477 | 14.950        | 14.939 |               |               |
| 1.88                                                       | 22.827        | 17.847  | 16.715         | 15.060  | 11.207         | 12.681 | 6.891         | 7.652  |               |               |
| <b>Experiment 5</b>                                        |               |         |                |         |                |        |               |        |               |               |
| [ATCh]<br>(mM)                                             | $v$ (mOD/min) |         |                |         |                |        |               |        | $K_i$<br>(pM) | SEA<br>(U/mg) |
|                                                            | opM of B7T    |         | 0.25 nM of B7T |         | 0.5 nM of B7T  |        | 1.0 nM of B7T |        |               |               |
| 15.00                                                      | 47.208        | 51.985  | 48.068         | 41.580  | 37.751         | 36.063 | 29.189        | 28.341 | 439.7 pM      | 39.8          |
| 7.50                                                       | 41.383        | 39.566  | 36.538         | 38.085  | 28.743         | 26.149 | 19.084        | 21.529 |               |               |
| 3.75                                                       | 30.471        | 27.812  | 25.868         | 23.132  | 16.393         | 17.101 | 15.266        | 13.735 |               |               |
| 1.88                                                       | 22.474        | 23.469  | 19.586         | 19.780  | 13.324         | 13.996 | 11.974        | 7.768  |               |               |
| <b>Bis(7)-tacrine in plastic vial with 250.0 pg eeAChE</b> |               |         |                |         |                |        |               |        |               |               |
| <b>Experiment 1</b>                                        |               |         |                |         |                |        |               |        |               |               |
| [ATCh]<br>(mM)                                             | $v$ (mOD/min) |         |                |         |                |        |               |        | $K_i$<br>(pM) | SEA<br>(U/mg) |
|                                                            | opM of B7T    |         | 0.5 nM of B7T  |         | 1.0 nM of B7T  |        | 1.5 nM of B7T |        |               |               |
| 15.00                                                      | 50.356        | 66.265  | 38.809         | 41.264  | 31.244         | 28.611 | 20.509        | 19.342 | 591.6 pM      | 23.4          |
| 7.50                                                       | 40.255        | 48.755  | 29.842         | 32.327  | 21.471         | 18.932 | 15.428        | 16.469 |               |               |
| 3.75                                                       | 22.012        | 27.373  | 17.915         | 20.609  | 13.562         | 10.804 | 9.623         | 10.174 |               |               |
| 1.88                                                       | 17.542        | 19.445  | 10.817         | 15.588  | 9.349          | 8.095  | 7.296         | 5.091  |               |               |
| <b>Experiment 2</b>                                        |               |         |                |         |                |        |               |        |               |               |
| [ATCh]<br>(mM)                                             | $v$ (mOD/min) |         |                |         |                |        |               |        | $K_i$<br>(pM) | SEA<br>(U/mg) |
|                                                            | opM of B7T    |         | 0.5 nM of B7T  |         | 1.0 nM of B7T  |        | 1.5 nM        |        |               |               |
| 15.00                                                      | 81.303        | 78.159  | 54.300         | 53.348  | 30.550         | 30.006 | 29.926        | 28.177 | 624.2 pM      | 32.0          |
| 7.50                                                       | 53.991        | 51.363  | 37.749         | 40.099  | 20.434         | 20.297 | 15.815        | 15.585 |               |               |
| 3.75                                                       | 30.074        | 27.295  | 21.115         | 22.331  | 12.071         | 11.389 | 10.135        | 9.167  |               |               |
| 1.88                                                       | 19.571        | 20.567  | 15.814         | 14.449  | 8.815          | 7.689  | 6.770         | 6.714  |               |               |
| <b>Experiment 3</b>                                        |               |         |                |         |                |        |               |        |               |               |
| [ATCh]<br>(mM)                                             | $v$ (mOD/min) |         |                |         |                |        |               |        | $K_i$<br>(pM) | SEA<br>(U/mg) |
|                                                            | opM of B7T    |         | 0.5 nM of B7T  |         | 1.0 nM of B7T  |        | 1.5 nM of B7T |        |               |               |
| 15.00                                                      | 65.636        | 79.451  | 57.878         | 53.320  | 44.522         | 37.627 | 25.305        | 26.798 | 701.5 pM      | 29.1          |
| 7.50                                                       | 51.187        | 59.260  | 47.771         | 43.864  | 37.782         | 33.882 | 22.182        | 20.671 |               |               |
| 3.75                                                       | 29.801        | 30.833  | 22.556         | 20.307  | 18.118         | 19.219 | 13.806        | 11.856 |               |               |



|                     |               |        |               |        |               |        |               |        |               |               |
|---------------------|---------------|--------|---------------|--------|---------------|--------|---------------|--------|---------------|---------------|
| 1.88                | 20.697        | 20.941 | 17.173        | 16.494 | 13.356        | 13.588 | 8.617         | 8.471  |               |               |
| <b>Experiment 4</b> |               |        |               |        |               |        |               |        |               |               |
| [ATCh]<br>(mM)      | $v$ (mOD/min) |        |               |        |               |        |               |        | $K_i$<br>(pM) | SEA<br>(U/mg) |
|                     | 0pM of B7T    |        | 0.5 nM of B7T |        | 1.0 nM of B7T |        | 1.5 nM of B7T |        |               |               |
| 15.00               | 51.731        | 45.302 | 36.026        | 39.138 | 34.133        | 31.114 | 29.528        | 27.178 | 989.0 pM      | 19.5          |
| 7.50                | 38.887        | 37.291 | 27.281        | 27.777 | 23.675        | 16.575 | 22.125        | 19.439 |               |               |
| 3.75                | 24.315        | 24.025 | 18.610        | 18.492 | 15.320        | 15.417 | 11.145        | 11.118 |               |               |
| 1.88                | 15.070        | 16.331 | 12.341        | 12.533 | 10.039        | 9.493  | 8.328         | 8.438  |               |               |
| <b>Experiment 5</b> |               |        |               |        |               |        |               |        |               |               |
| [ATCh]<br>(mM)      | $v$ (mOD/min) |        |               |        |               |        |               |        | $K_i$<br>(pM) | SEA<br>(U/mg) |
|                     | 0pM of B7T    |        | 0.5 nM of B7T |        | 1.0 nM of B7T |        | 1.5 nM of B7T |        |               |               |
| 15.00               | 61.400        | 61.028 | 48.224        | 48.531 | 37.041        | 32.436 | 23.231        | 22.383 | 764.3 pM      | 24.6          |
| 7.50                | 40.257        | 40.984 | 35.235        | 33.565 | 19.538        | 18.890 | 15.634        | 15.068 |               |               |
| 3.75                | 23.815        | 22.042 | 16.711        | 16.037 | 15.271        | 14.422 | 10.170        | 12.894 |               |               |
| 1.88                | 14.424        | 15.936 | 11.470        | 12.211 | 7.559         | 8.884  | 7.553         | 5.654  |               |               |

Table S2A. Absorbance data of bis(7)-tacrine solutions with or without 0.4% Polysorbate 20 that were prepared using glass or plastic vials.

| Bis(7)-tacrine solution that was prepared using plastic vials                       |                                      |        |        |  |       |       |      |
|-------------------------------------------------------------------------------------|--------------------------------------|--------|--------|--|-------|-------|------|
| [B7T]<br>( $\mu\text{M}$ )                                                          | Absorbance at $\lambda$ 244 nm (mOD) |        |        |  |       |       |      |
|                                                                                     | Exp. 1                               | Exp. 2 | Exp. 3 |  | Mean  | SEM   | N    |
| 30.0                                                                                | 1.499                                | 1.52   | 1.559  |  | 1.526 | 0.018 | 3.00 |
| 20.0                                                                                | 0.997                                | 1.018  | 1.033  |  | 1.016 | 0.010 | 3.00 |
| 15.0                                                                                | 0.736                                | 0.757  | 0.775  |  | 0.756 | 0.011 | 3.00 |
| 10.0                                                                                | 0.503                                | 0.496  | 0.522  |  | 0.507 | 0.008 | 3.00 |
| 7.5                                                                                 | 0.378                                | 0.372  | 0.398  |  | 0.383 | 0.008 | 3.00 |
| 5.0                                                                                 | 0.259                                | 0.24   | 0.252  |  | 0.250 | 0.006 | 3.00 |
| Bis(7)-tacrine solution that was prepared using glass vials                         |                                      |        |        |  |       |       |      |
| [B7T]<br>( $\mu\text{M}$ )                                                          | Absorbance at $\lambda$ 244 nm (mOD) |        |        |  |       |       |      |
|                                                                                     | Exp. 1                               | Exp. 2 | Exp. 3 |  | Mean  | SEM   | N    |
| 30.0                                                                                | 1.34                                 | 1.274  | 1.245  |  | 1.286 | 0.028 | 3.00 |
| 20.0                                                                                | 0.899                                | 0.877  | 0.853  |  | 0.876 | 0.013 | 3.00 |
| 15.0                                                                                | 0.628                                | 0.589  | 0.61   |  | 0.609 | 0.011 | 3.00 |
| 10.0                                                                                | 0.406                                | 0.403  | 0.362  |  | 0.390 | 0.014 | 3.00 |
| 7.5                                                                                 | 0.276                                | 0.259  | 0.265  |  | 0.267 | 0.005 | 3.00 |
| 5.0                                                                                 | 0.179                                | 0.171  | 0.173  |  | 0.174 | 0.002 | 3.00 |
| Bis(7)-tacrine solution that was prepared using glass vials in presence of 0.4% P20 |                                      |        |        |  |       |       |      |
| [B7T]<br>( $\mu\text{M}$ )                                                          | Absorbance at $\lambda$ 244 nm (mOD) |        |        |  |       |       |      |
|                                                                                     | Exp. 1                               | Exp. 2 | Exp. 3 |  | Mean  | SEM   | N    |
| 30.0                                                                                | 1.419                                | 1.356  | 1.443  |  | 1.406 | 0.026 | 3.00 |
| 20.0                                                                                | 0.912                                | 0.913  | 0.927  |  | 0.917 | 0.005 | 3.00 |
| 15.0                                                                                | 0.688                                | 0.672  | 0.709  |  | 0.690 | 0.011 | 3.00 |
| 10.0                                                                                | 0.451                                | 0.445  | 0.443  |  | 0.446 | 0.002 | 3.00 |
| 7.5                                                                                 | 0.331                                | 0.324  | 0.337  |  | 0.331 | 0.004 | 3.00 |
| 5.0                                                                                 | 0.216                                | 0.203  | 0.21   |  | 0.210 | 0.004 | 3.00 |

Table S2B. Absorbance data of tacrine solutions were prepared using glass or plastic vials.

| Tacrine solution that was prepared using plastic vials |                                      |        |        |  |       |       |      |
|--------------------------------------------------------|--------------------------------------|--------|--------|--|-------|-------|------|
| [THA]<br>( $\mu\text{M}$ )                             | Absorbance at $\lambda$ 242 nm (mOD) |        |        |  |       |       |      |
|                                                        | Exp. 1                               | Exp. 2 | Exp. 3 |  | Mean  | SEM   | N    |
| 30.0                                                   | 1.141                                | 1.111  | 1.07   |  | 1.107 | 0.021 | 3.00 |
| 20.0                                                   | 0.734                                | 0.744  | 0.721  |  | 0.733 | 0.007 | 3.00 |
| 15.0                                                   | 0.566                                | 0.557  | 0.547  |  | 0.557 | 0.005 | 3.00 |
| 10.0                                                   | 0.378                                | 0.372  | 0.365  |  | 0.372 | 0.004 | 3.00 |
| 7.5                                                    | 0.275                                | 0.278  | 0.275  |  | 0.276 | 0.001 | 3.00 |
| 5.0                                                    | 0.185                                | 0.186  | 0.183  |  | 0.185 | 0.001 | 3.00 |
| Tacrine solution that was prepared using glass vials   |                                      |        |        |  |       |       |      |
| [THA]<br>( $\mu\text{M}$ )                             | Absorbance at $\lambda$ 242 nm (mOD) |        |        |  |       |       |      |
|                                                        | Exp. 1                               | Exp. 2 | Exp. 3 |  | Mean  | SEM   | N    |
| 30.0                                                   | 1.104                                | 1.072  | 1.094  |  | 1.090 | 0.009 | 3.00 |
| 20.0                                                   | 0.753                                | 0.722  | 0.717  |  | 0.731 | 0.011 | 3.00 |
| 15.0                                                   | 0.556                                | 0.542  | 0.54   |  | 0.546 | 0.005 | 3.00 |
| 10.0                                                   | 0.376                                | 0.369  | 0.362  |  | 0.369 | 0.004 | 3.00 |
| 7.5                                                    | 0.277                                | 0.276  | 0.297  |  | 0.283 | 0.007 | 3.00 |
| 5.0                                                    | 0.186                                | 0.189  | 0.186  |  | 0.187 | 0.001 | 3.00 |

Figure S1. Plots for  $K_i$  determination under different assay conditions. Left: reciprocal hydrolysis rate ( $1/v$  in second per optical density) was plotted against reciprocal substrate concentration ( $1/[ATCh]$  in  $1/mM$ ) in the absence and presence of an inhibitor at varying concentration; right: the slope of the double reciprocal plot was plotted against inhibitor concentration ( $[I]$   $\mu M$  or  $nM$  or  $pM$ ).  $K_i$  was obtained from the negative x intercept of the slope replot.

Figure S1A. Tacrine in plastic vial with 10.4 pg *eeAChE*.

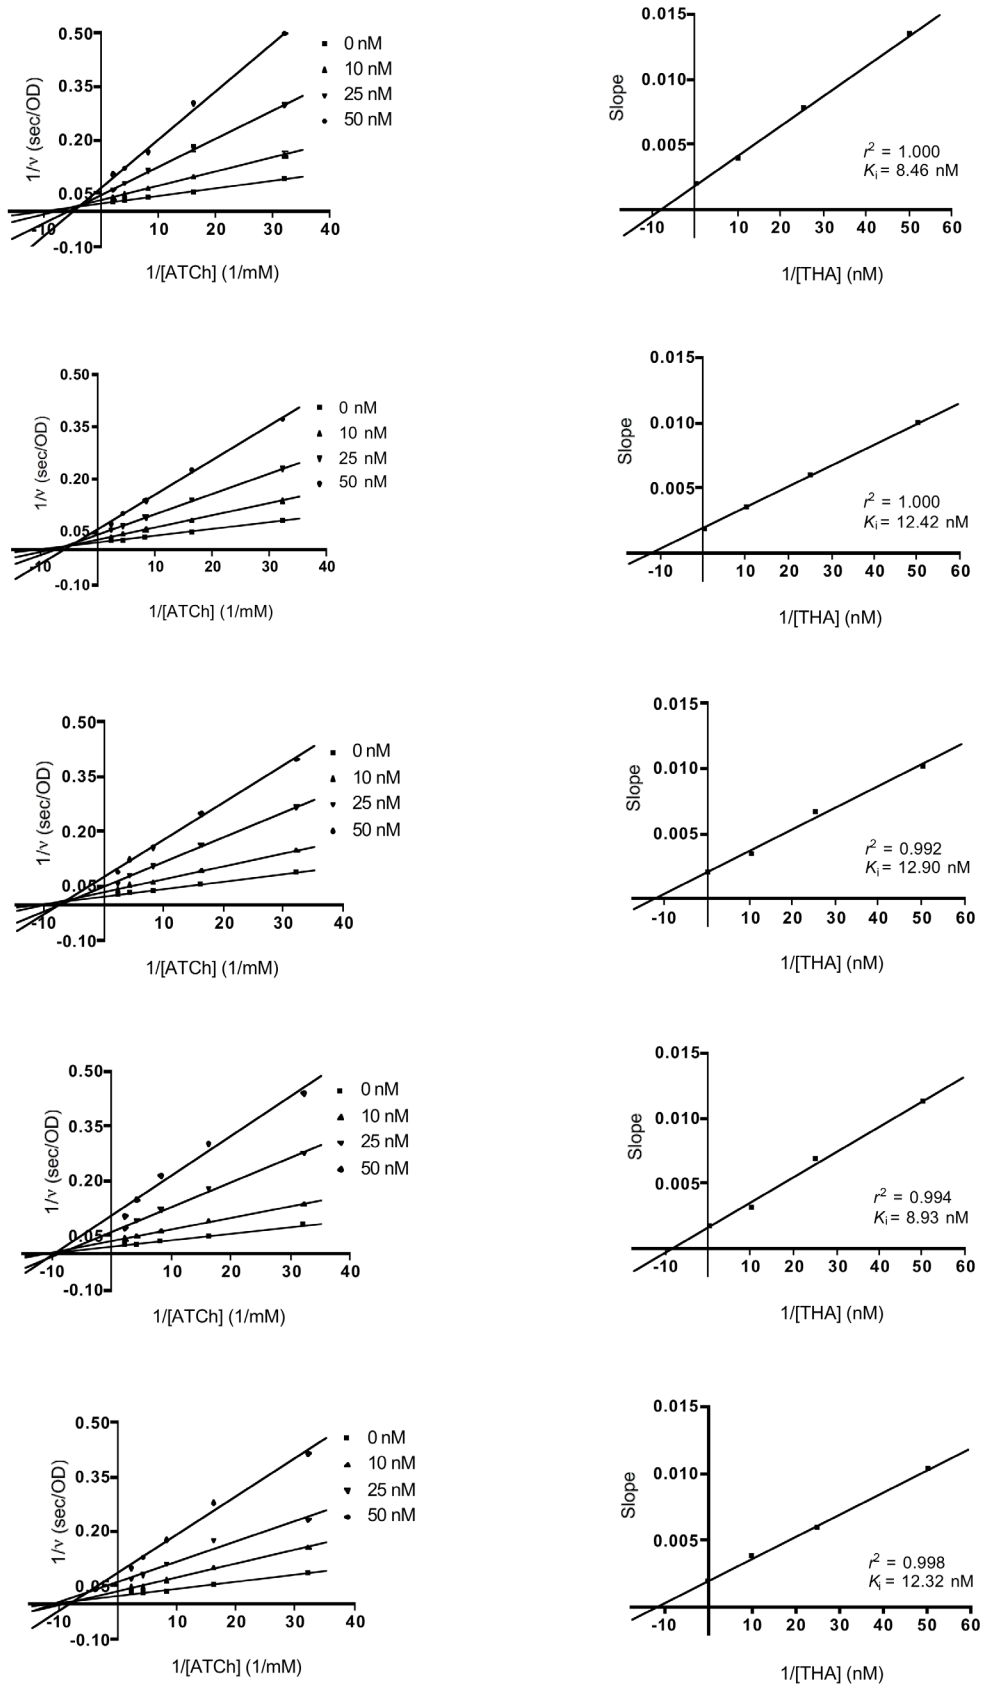

Figure S1B. Tacrine in plastic vial with 41.7 pg *eeAChE*.

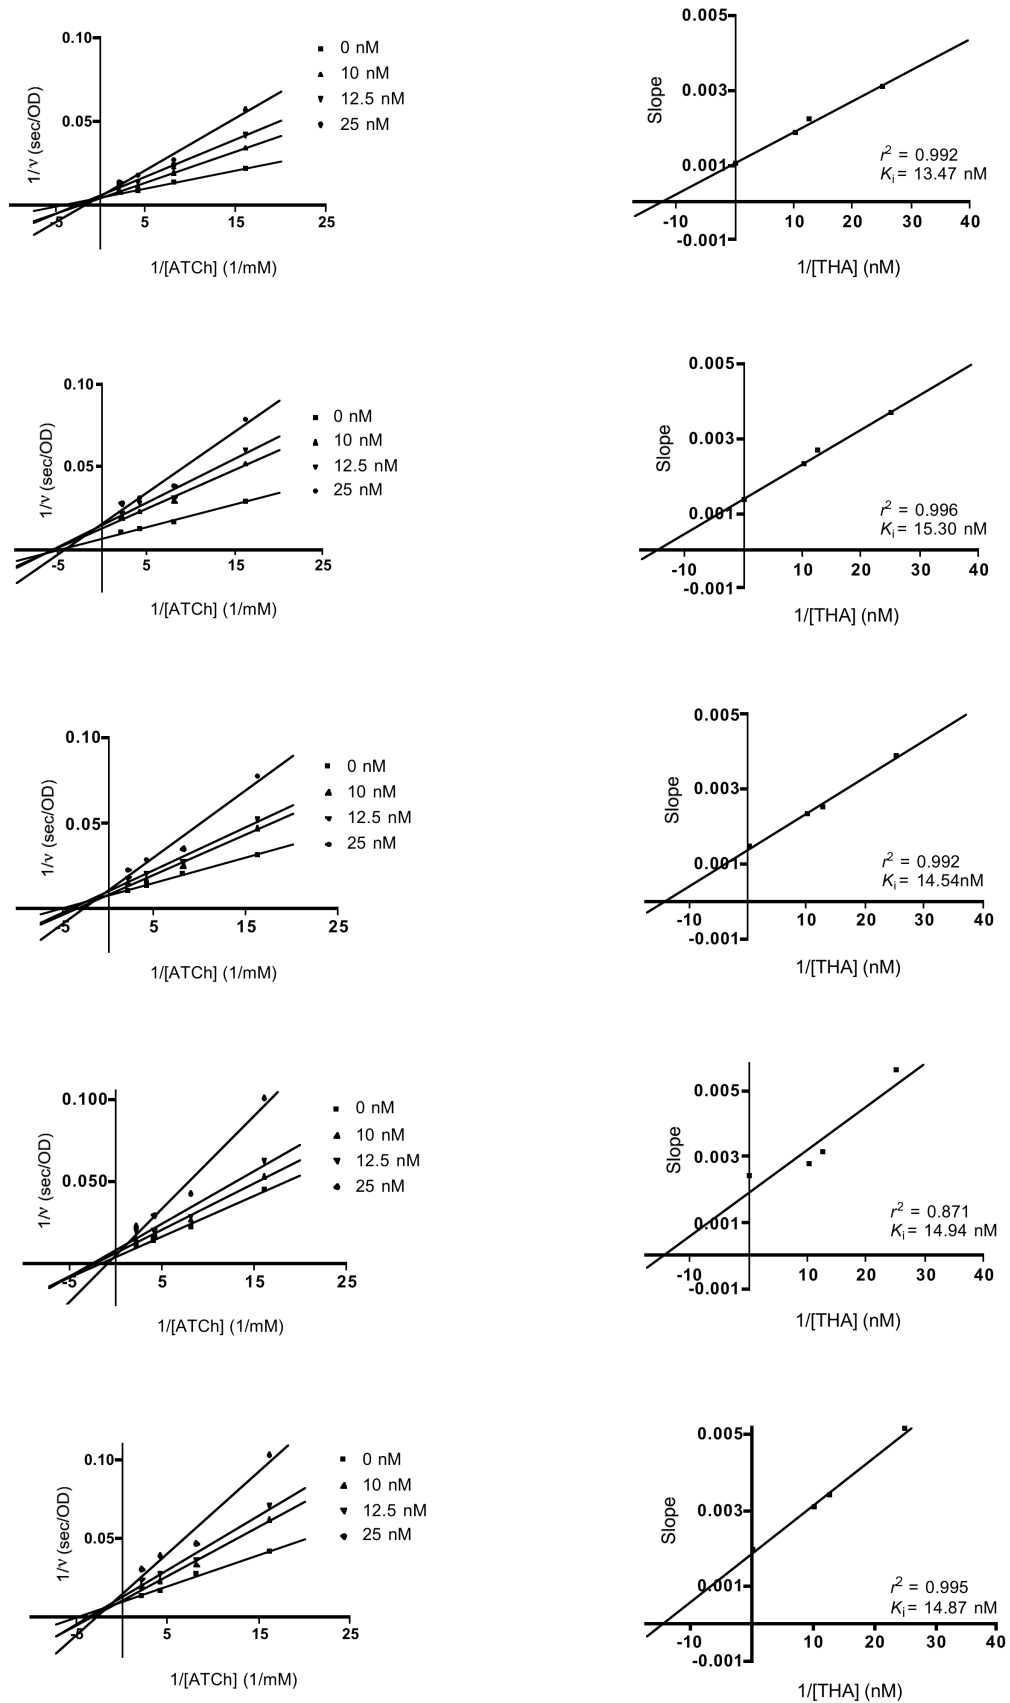

Figure S1C. Tacrine in plastic vial with 83.3 pg *eeAChE*.

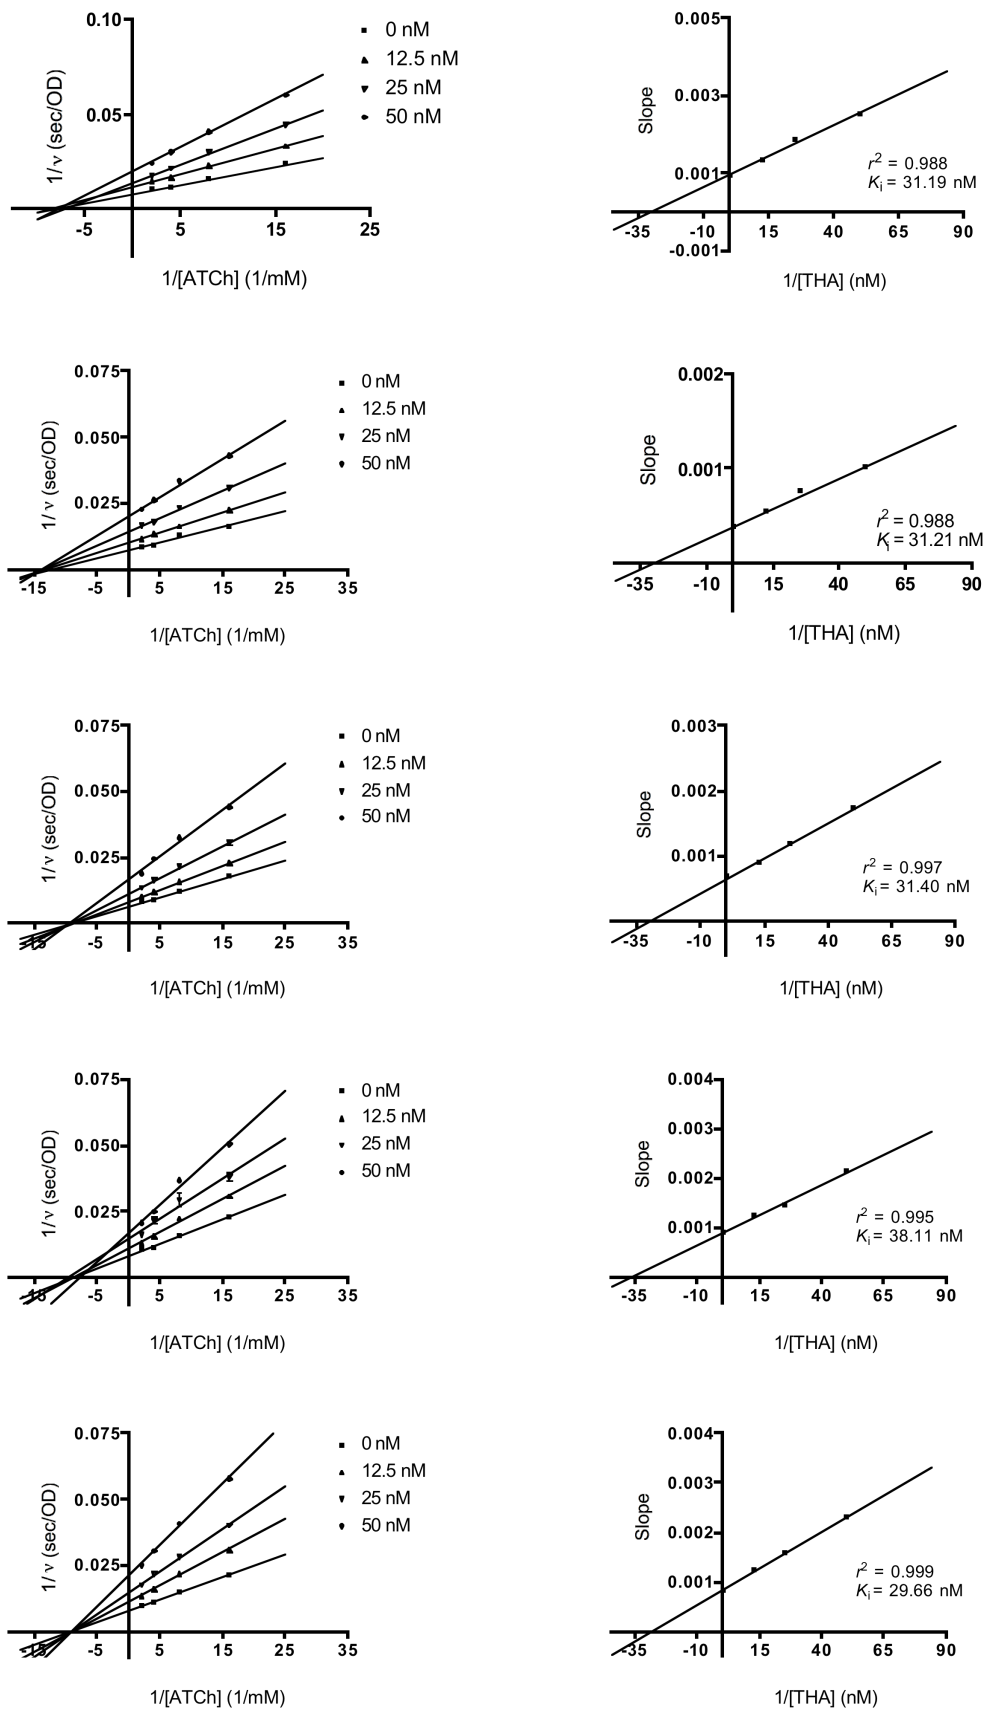

Figure S1D. Tacrine in glass vial with 83.3 pg *eeAChE*.

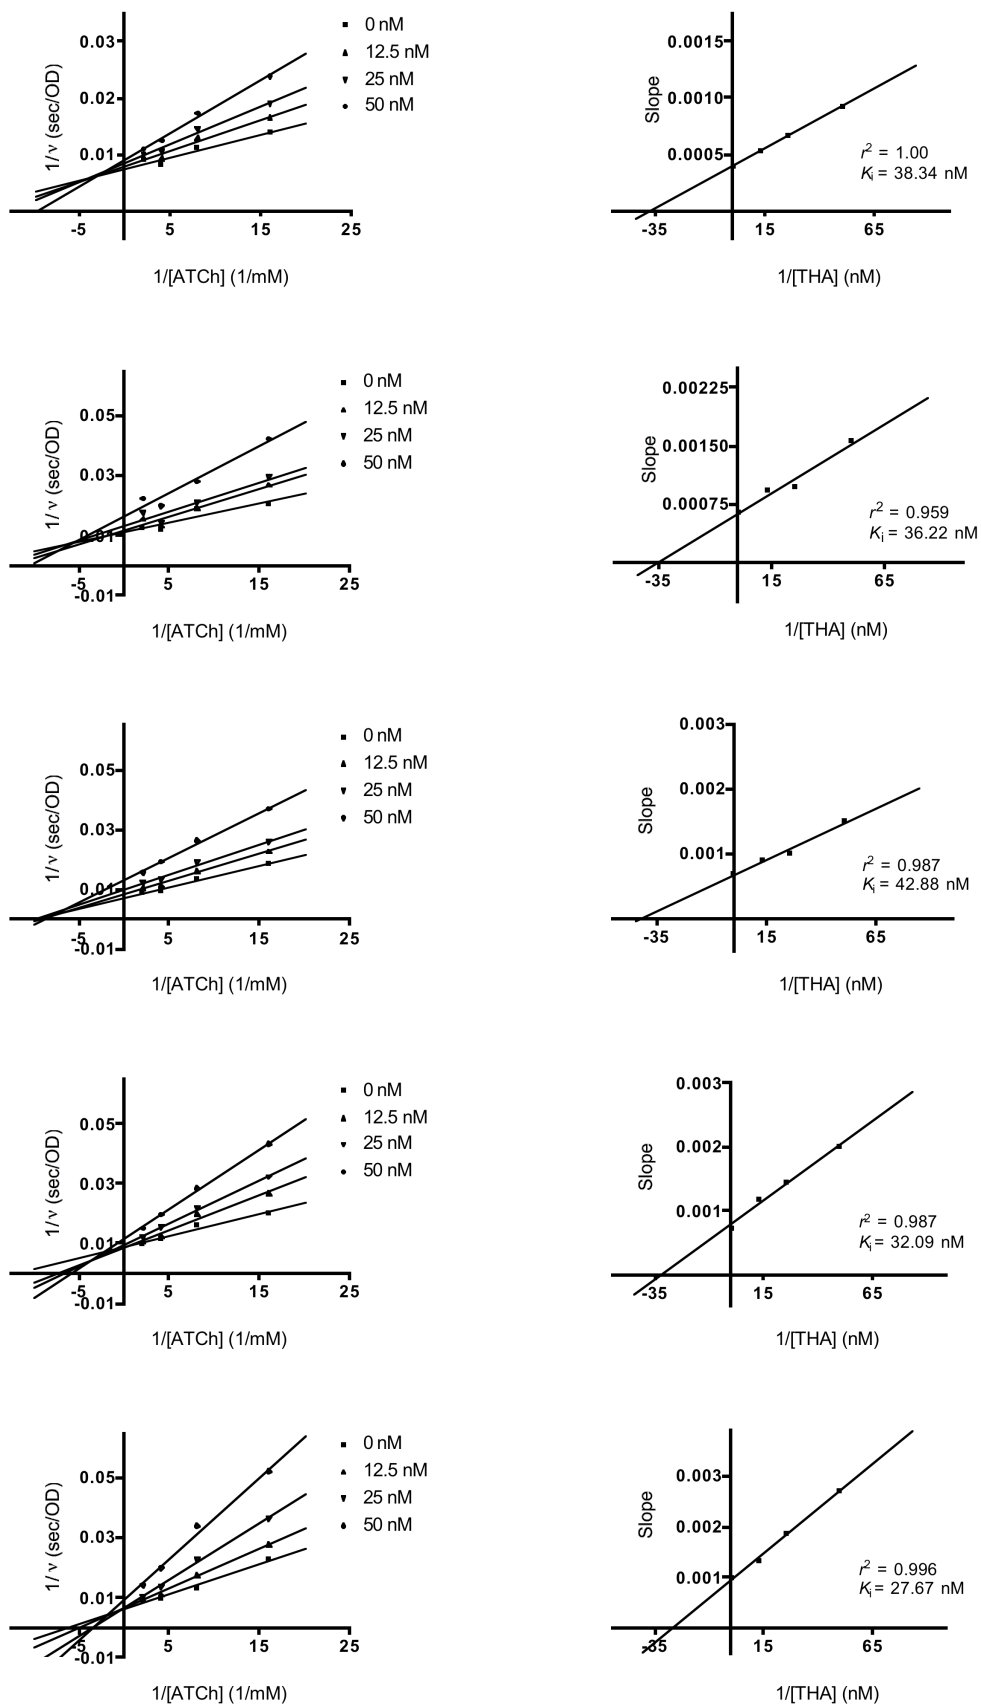

Figure S1E. Tacrine in plastic vial with 125.0 pg *eeAChE*.

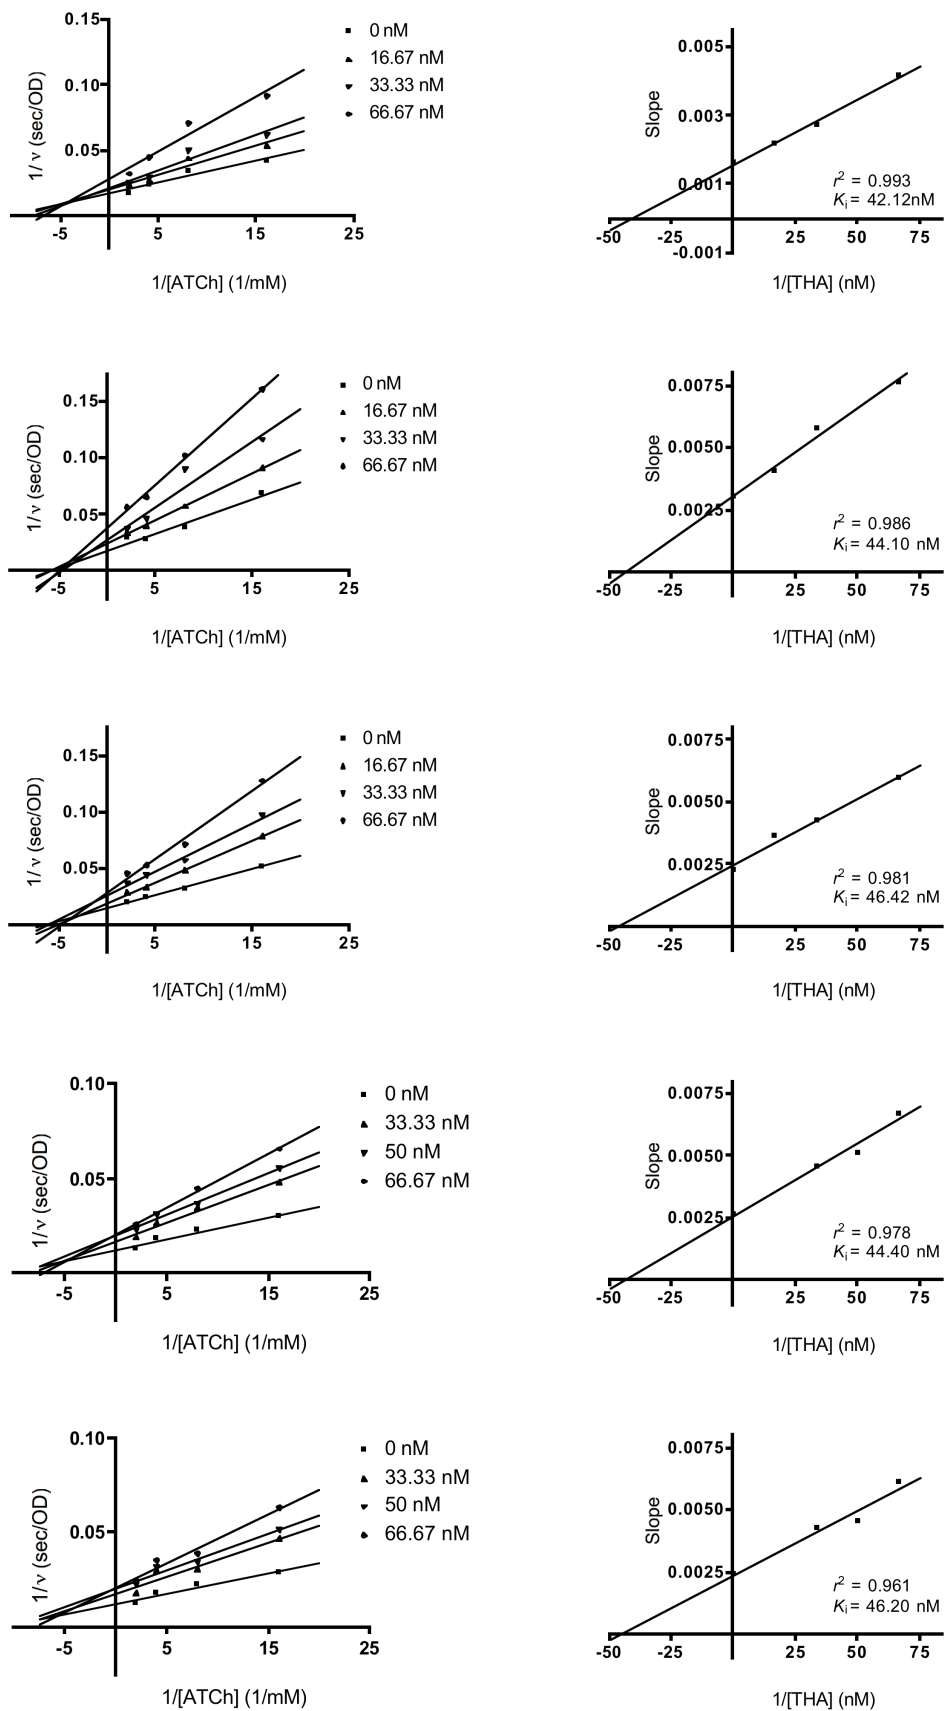



Figure S1F. Tacrine in plastic vial with 250.0 pg *eeAChE*.

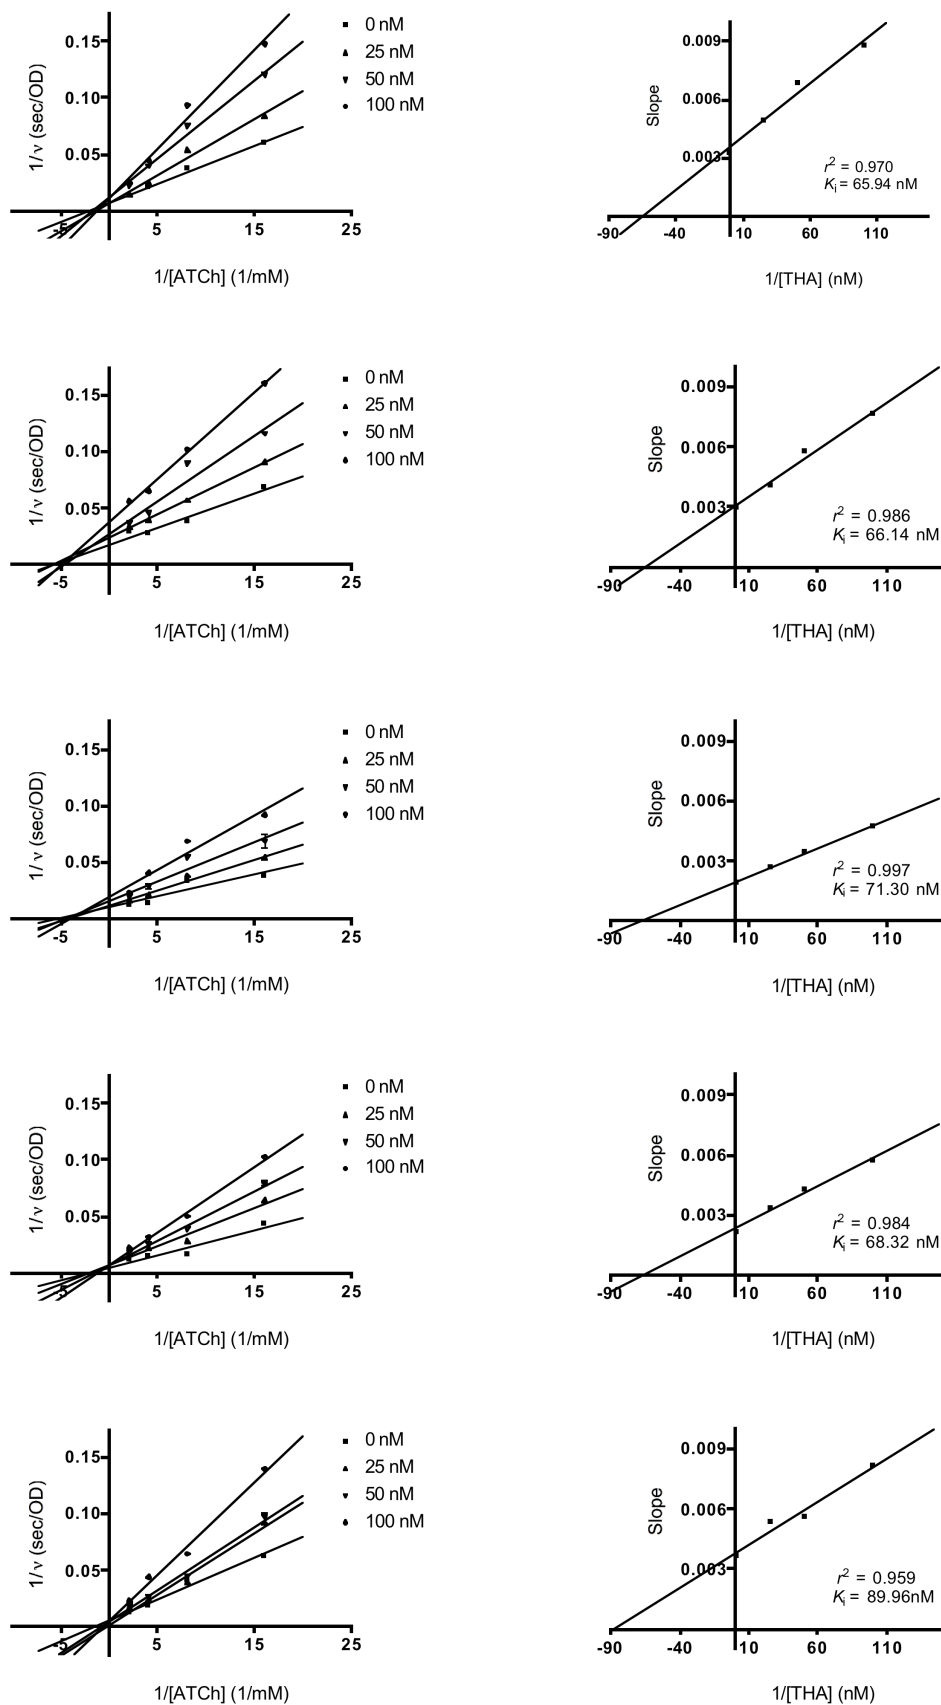

Figure S1G. Bis(7)-tacrine in glass vial with 10.4 pg *eeAChE*.

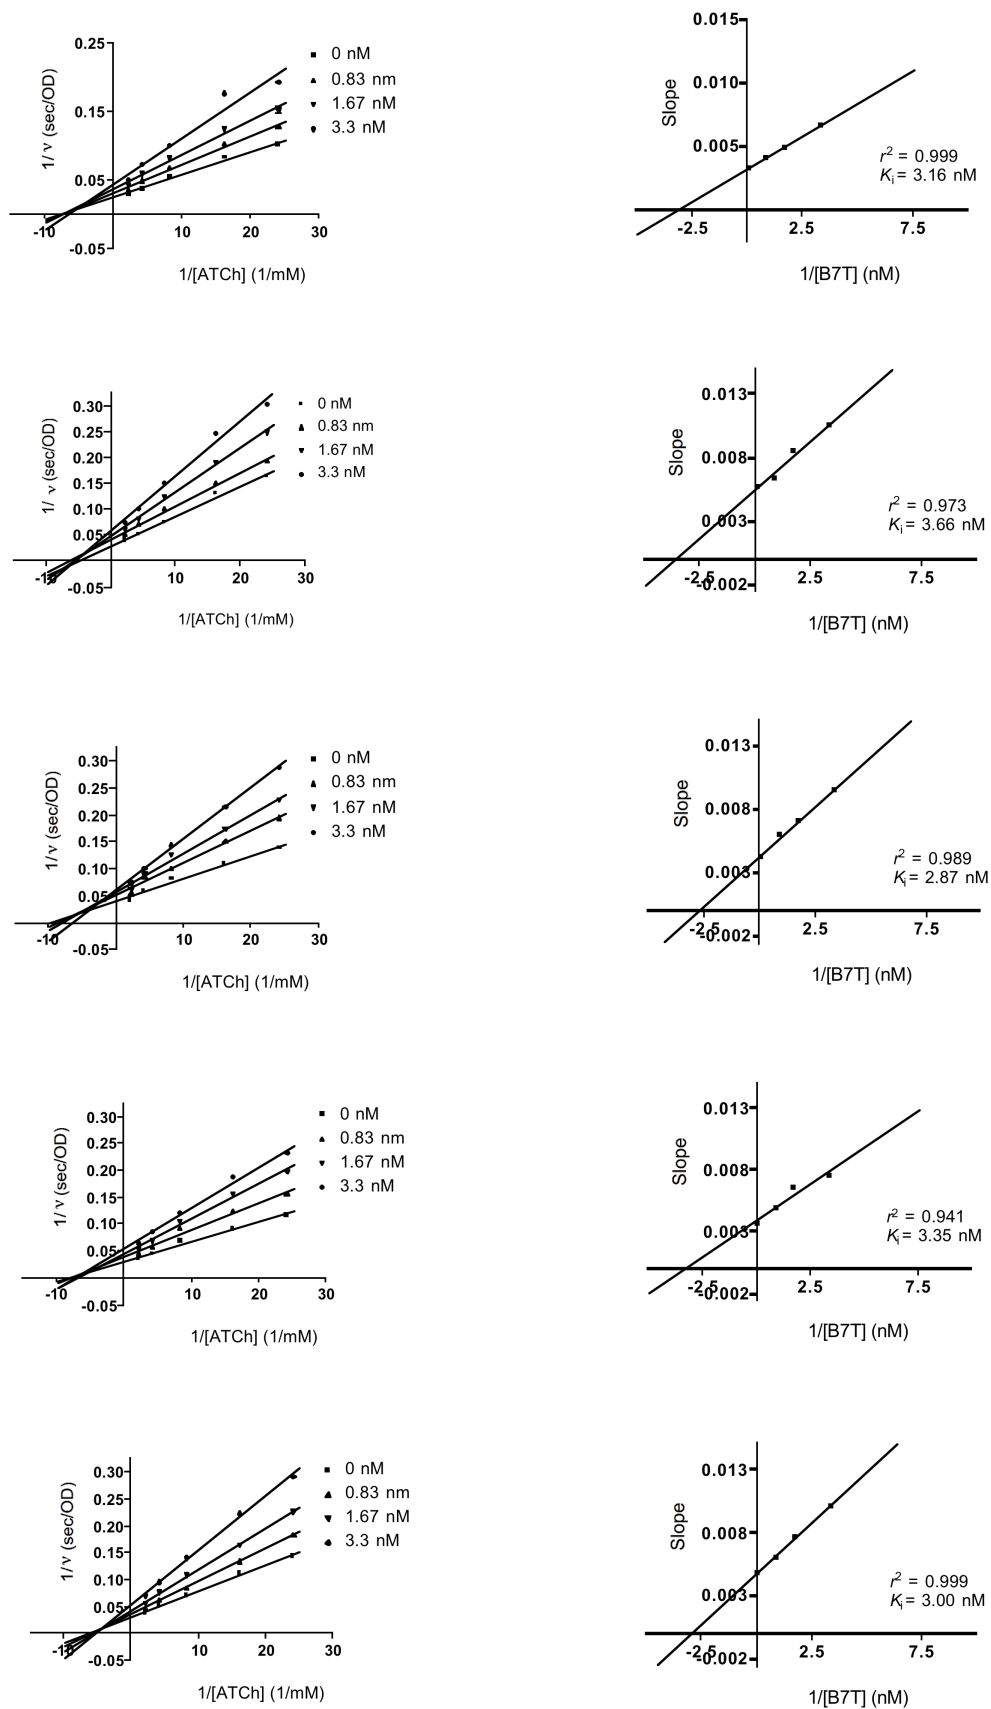

Figure S1H. Bis(7)-tacrine in plastic vial with 10.4 pg *eeAChE*.

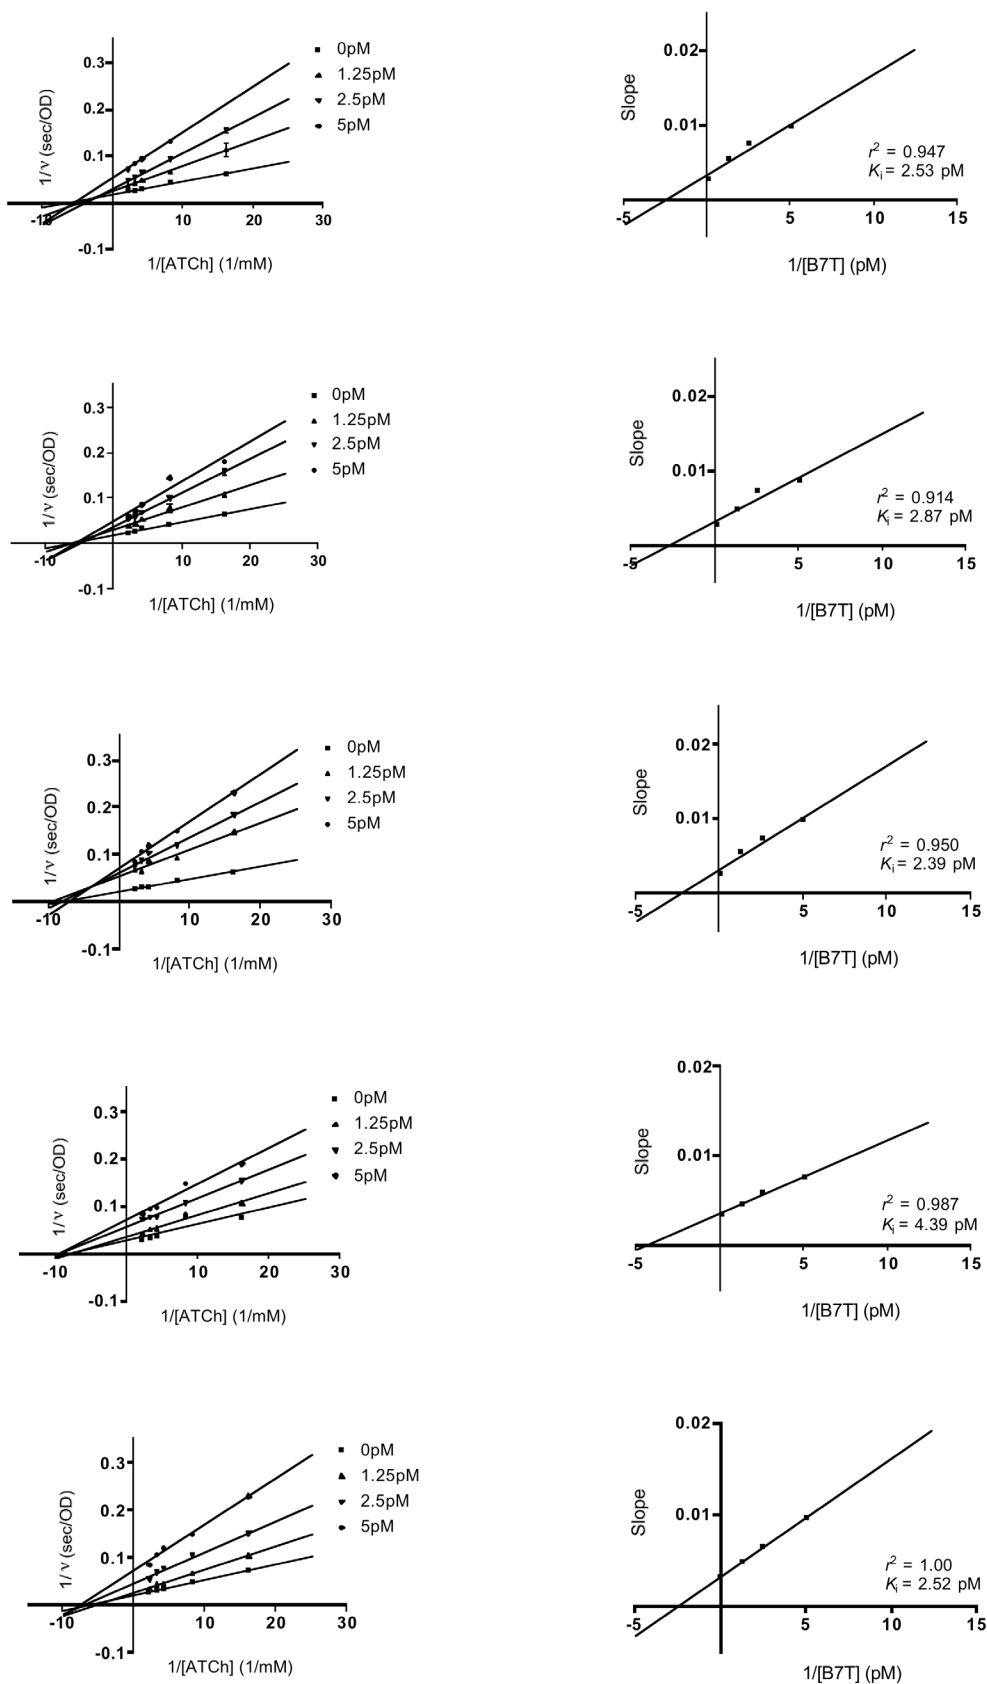

Figure S1I. Bis(7)-tacrine in plastic vial with 41.7 pg *eeAChE*.

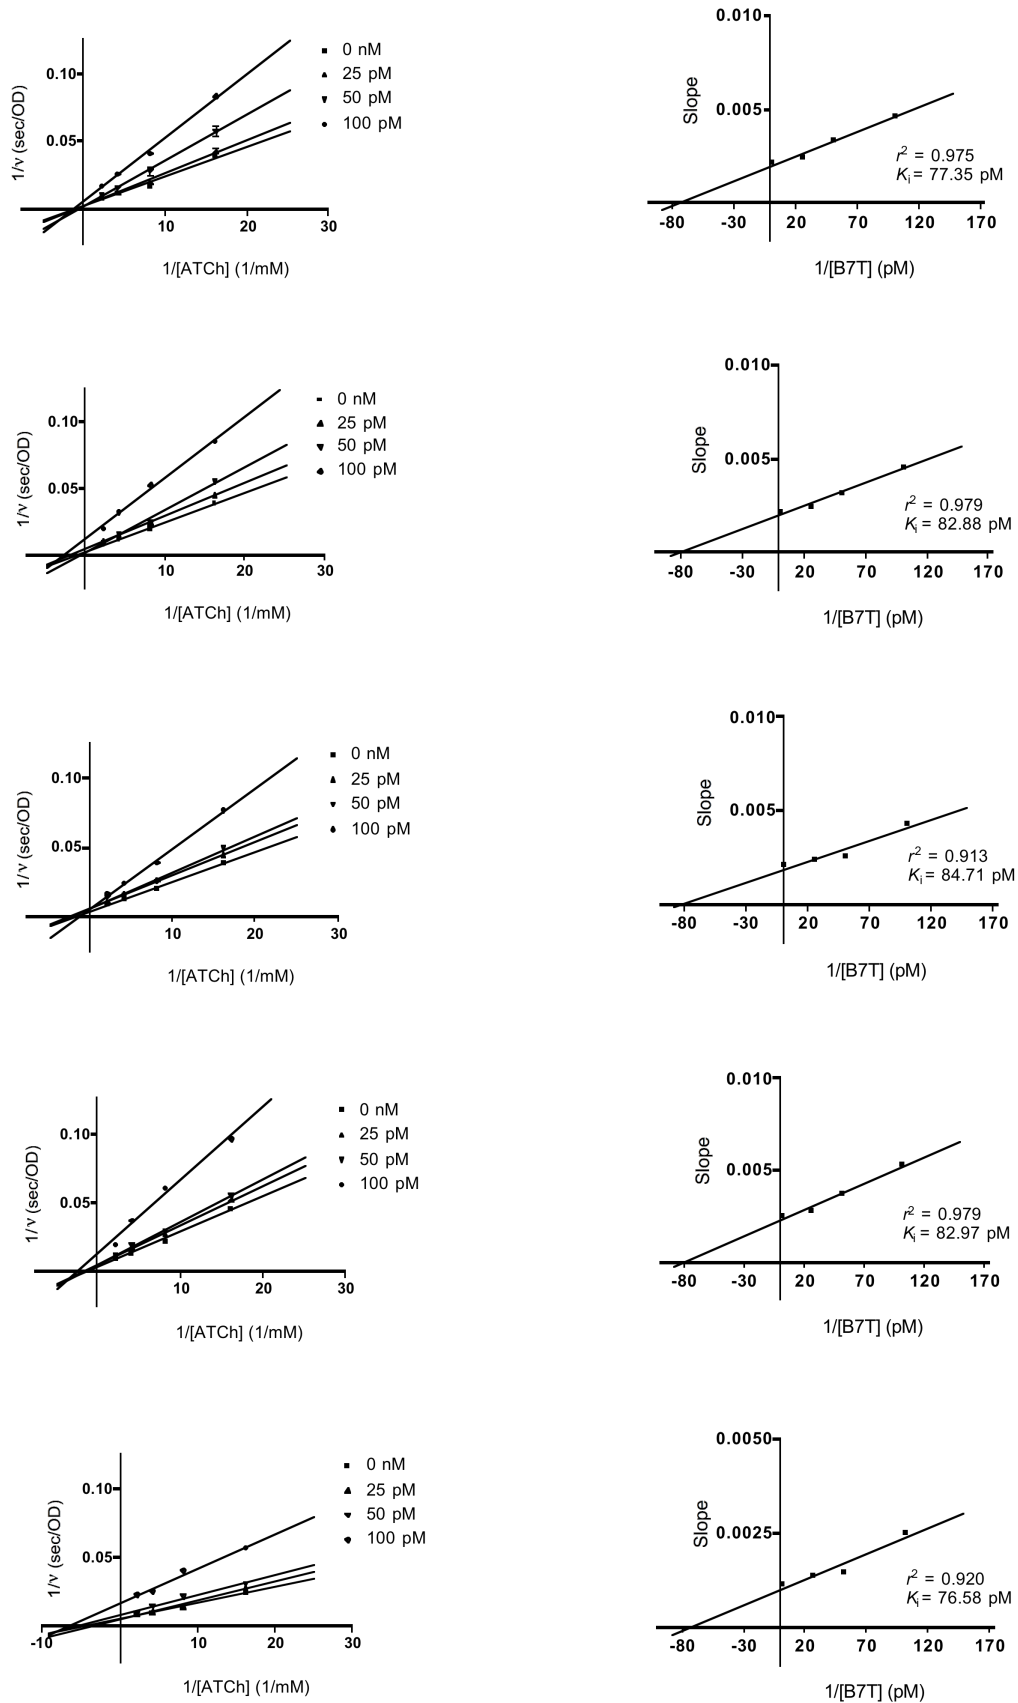

Figure S1J. Bis(7)-tacrine in plastic vial with 125.0 pg *eeAChE*.

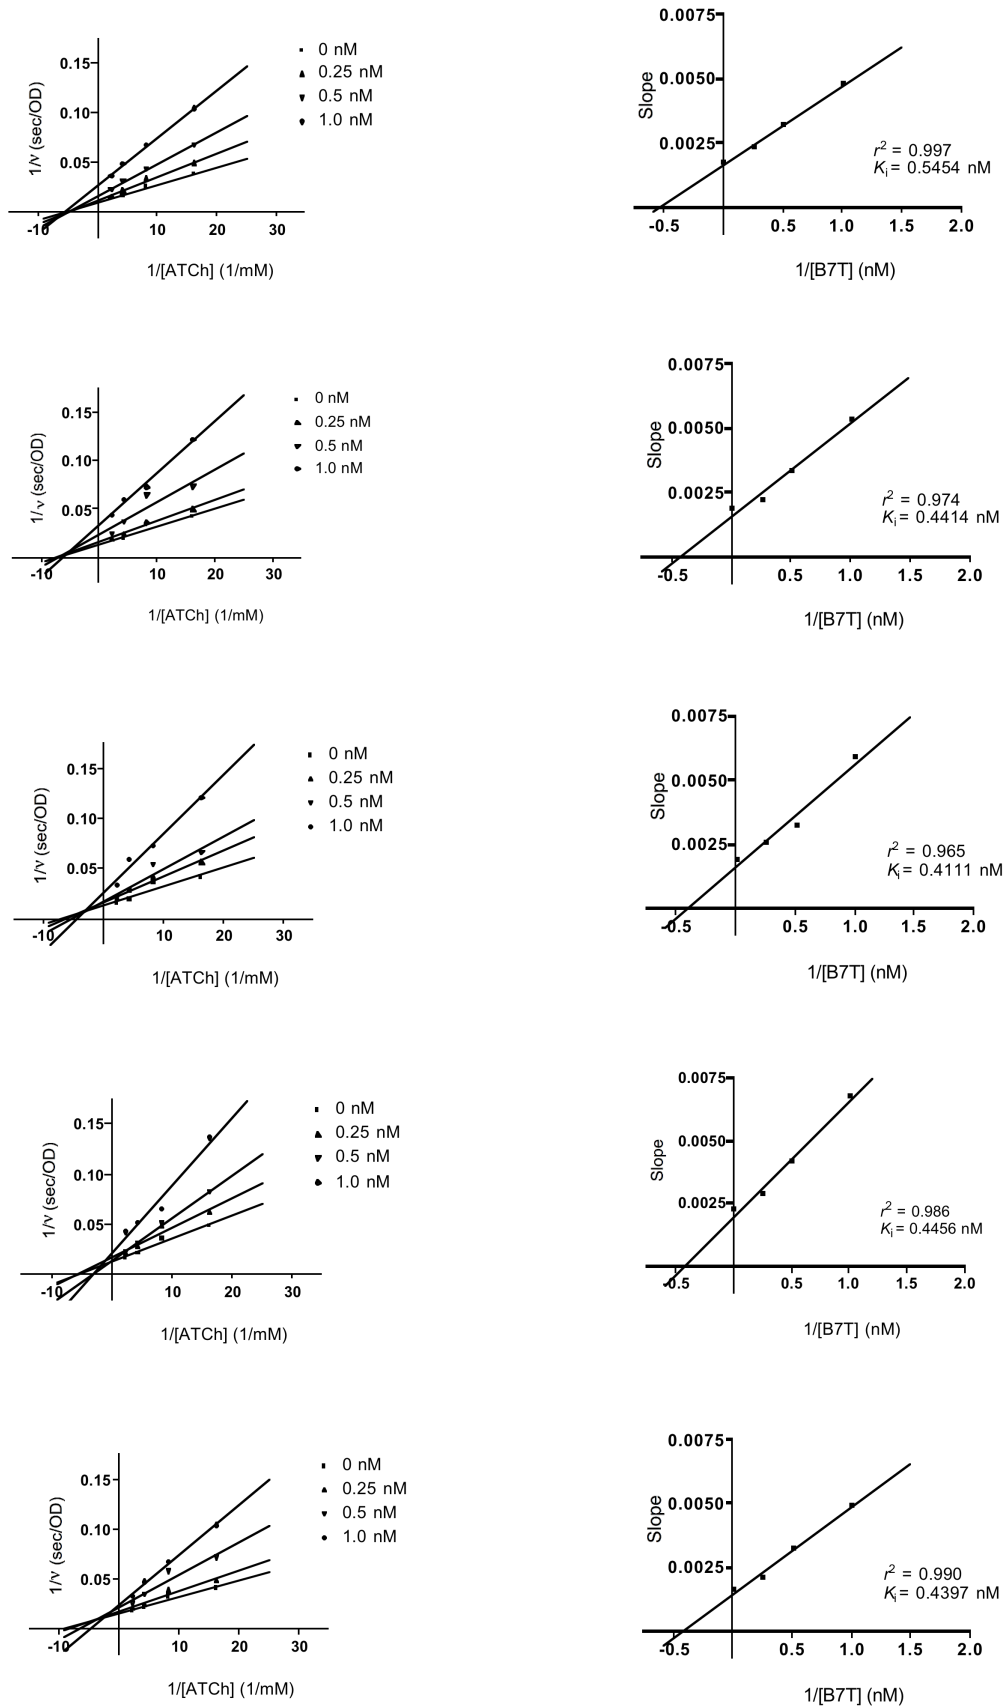

Figure S1K. Bis(7)-tacrine in plastic vial with 250.0 pg *eeAChE*.

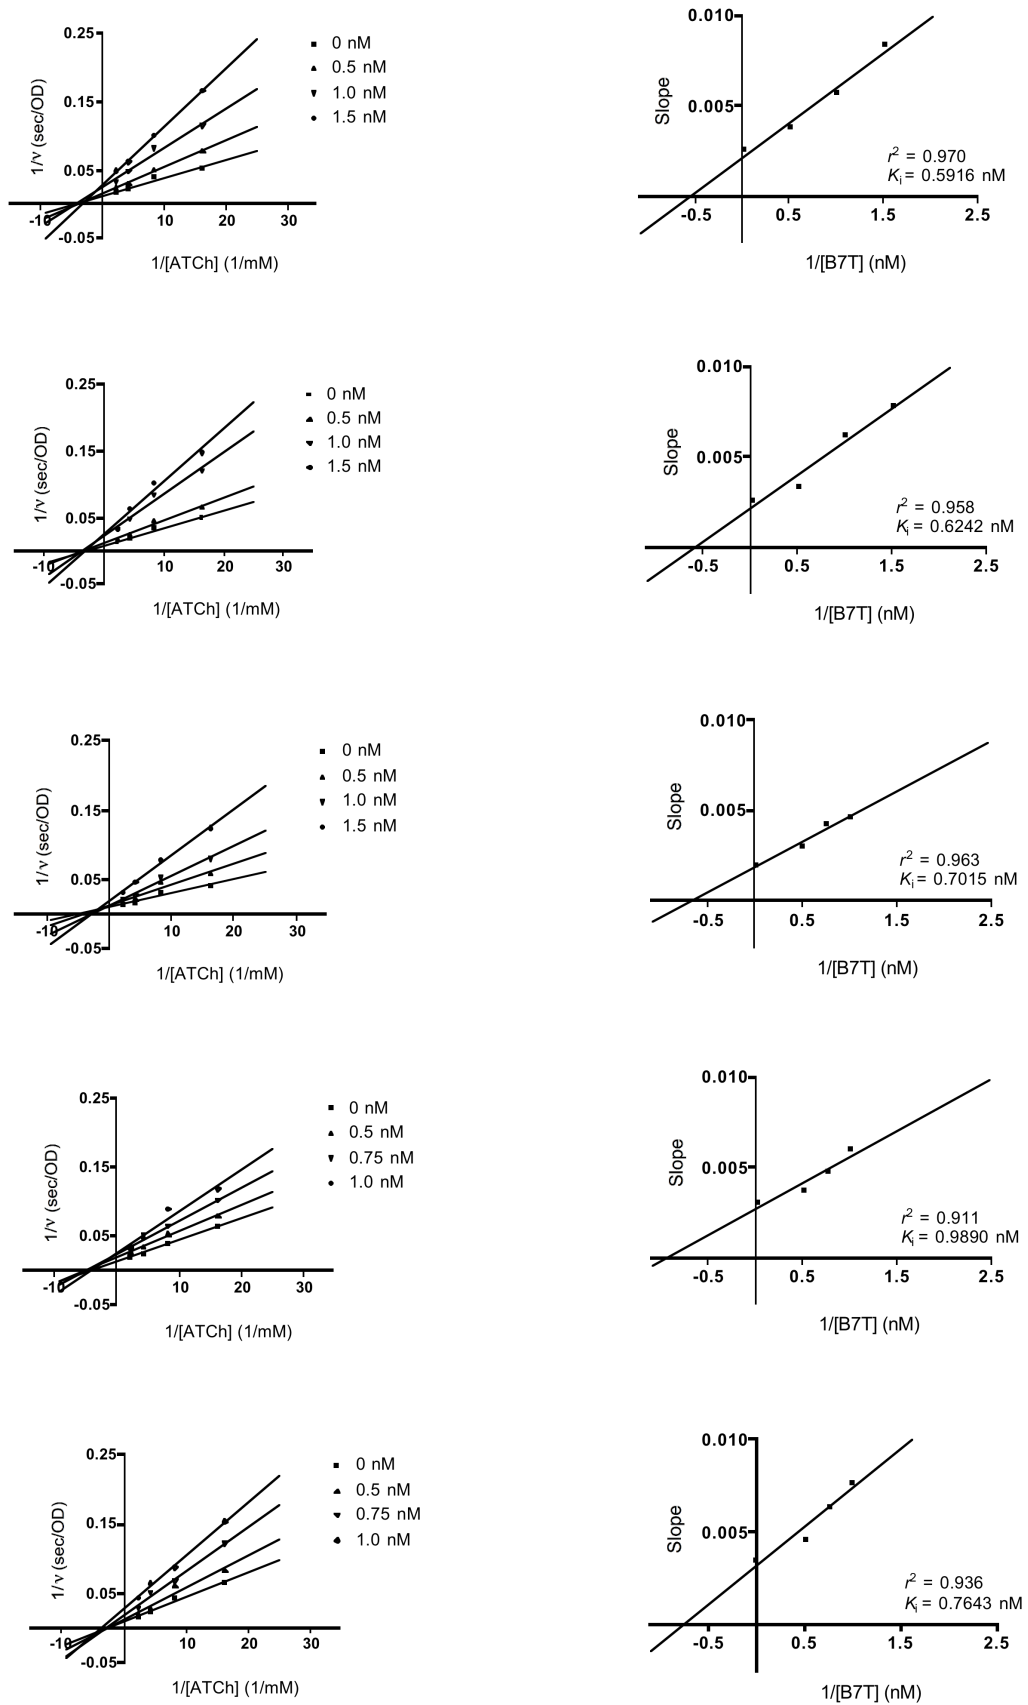

## References

- 1 Pang, Y.-P., Quiram, P., Jelacic, T., Hong, F. & Brimijoin, S. Highly potent, selective, and low cost bis-tetrahydroaminacrine inhibitors of acetylcholinesterase: steps toward novel drugs for treating Alzheimer's disease. *J. Biol. Chem.* **271**, 23646–23649 (1996).
- 2 Ellman, G. L., Courtney, K. D., Andres, V. J. & Featherstone, R. M. A new and rapid colorimetric determination of acetylcholinesterase activity. *Biochem. Pharmacol.* **7**, 88-95 (1961).
- 3 Eyer, P. *et al.* Molar absorption coefficients for the reduced Ellman reagent: Reassessment. *Anal. Biochem.* **312**, 224–227 (2003).
- 4 Tipton, K. F. in *Enzyme assays: A practical approach* (eds R. Eisenthal & M.J. Danson) 19 (Oxford University Press, 2002).
- 5 Lineweaver, H. & Burk, D. The determination of enzyme dissociation constants. *J. Am. Chem. Soc.* **56**, 658-666 (1934).
